# Supplementary material
Source: MDPI journal article supplement (https://www.mdpi.com/2673-401X/4/2/20)
Supplement: s1 [file s1]

## SUPPORTING INFORMATION

# Facile Photochemical/Thermal Assisted Hydration of Alkynes Catalysed under Aqueous media by a Chalcogen Stabilized, Robust, Economical, and Reusable $\text{Fe}_3\text{Se}_2(\text{CO})_9$ Cluster

Munsaf Ali <sup>1,2,†</sup>, Avinash K. Srivastava <sup>1,3,†</sup>, Nitinkumar Satyadev Upadhyay <sup>2</sup>, Naveen Satrawala <sup>1</sup> and Raj K. Joshi <sup>1,\*</sup>

<sup>1</sup> Department of Chemistry, Malaviya National Institute of Technology, Jaipur 302017, India

<sup>2</sup> Colleges of Nanoscale Science and Engineering, SUNY Polytechnic Institute, 257 Fuller Road, Albany, NY 12203, USA

<sup>3</sup> Department of Chemistry, University of Alabama at Birmingham, Birmingham, AL 35294, USA

\* Correspondence: rkjoshi.chy@mnit.ac.in

† These authors contributed equally to this work.

**Experimental Details:** The  $^1\text{H}$ ,  $^{13}\text{C}$   $\{^1\text{H}\}$  NMR spectra were recorded using JEOL ECS-400 spectrometer (operating at 400 MHz for  $^1\text{H}$  and 100 MHz for  $^{13}\text{C}$ ).

**Chemicals and reagents:** Reactants, reagents, chemicals and solvents available commercially within the country were used.

## Experimental

**Procedure for the synthesis of  $\text{Fe}_3\text{E}_2(\text{CO})_9$  Complex<sup>1</sup>:** In an ice cold bath 2 neck R.B. flask equipped nitrogen inlet. 1 ml of 50% KOH solution was added followed by the addition of 10 ml of MeOH. The mixture was stirred for 20 minutes. To the above solution (6.525 mmol) of  $\text{FeCO}_5$  was added and the solution was further stirred for 30 minutes while maintaining the temperature  $0^\circ\text{C}$  subsequently 80 ml aq. solution of  $\text{Na}_2\text{SeO}_3 \cdot 5\text{H}_2\text{O}$  /  $\text{Na}_2\text{SO}_3 \cdot 5\text{H}_2\text{O}$  /  $\text{Na}_2\text{TeO}_3$  (7.6 mmol) was added and the ice bath surrounding the R.B. was removed after 20 minutes. The solution was allowed stirring at room temperature for 30 min. The solution was cooled to  $0^\circ\text{C}$  and the mixture was acidified with HCl (6M, 11.25ml) till completion. The content was filtered through the celite pad under  $\text{N}_2$  atmosphere. The solid on the celite pad was thoroughly washed with distilled water (100 ml) and dried under vacuum and extracted with 6-50 ml portion of pure  $\text{CH}_2\text{Cl}_2$ . The combined extracts was filtered through a celite pad and the filtrate was evaporated to dryness.

**General Procedure for the Catalytic Reaction:** To a 100 mL capacity borosilcate immersion well of UV reactor 80 mL, water is used as solvent, alkyne (1 mmol), Fe catalyst (5 mol%) was added, The reaction mixture was first cool down at  $-5^\circ\text{C}$  then it was exposed to the Hg vapour UV lamp, 125 W, 289 nm for 25 min with continuous stirring. After completion of the reaction, catalyst was separated through filtration and product was extracted through solvent extraction with ethyl acetate. The extracted solvent is dried over anhydrous  $\text{Na}_2\text{SO}_4$ , concentrated at reduced pressure, and purified by flash column chromatography with hexanes/ethyl acetate as eluent to obtain the corresponding product.

## Characterisation Data

Acetophenone <sup>2</sup>

<sup>1</sup>H NMR (400 MHz, CDCl<sub>3</sub>): δ = 7.87 – 7.85 (m, 2H), 7.48 – 7.44 (m, 1H), 7.38 – 7.34 (m, 2H), 2.50 (s, 3H). <sup>13</sup>C NMR (100 MHz, CDCl<sub>3</sub>): δ = 198.34, 137.26, 133.32, 128.77, 128.50, 26.81.

1-(4-(tert-butyl)phenyl)ethan-1-one <sup>3</sup>

<sup>1</sup>H NMR (400 MHz, CDCl<sub>3</sub>): δ = 7.82 – 7.80 (m, 2H), 7.39 – 7.37 (m, 2H), 2.48 (s, 3H), 1.24 (s, 9H). <sup>13</sup>C NMR (100 MHz, CDCl<sub>3</sub>): δ = 197.66, 156.52, 134.27, 131.55, 129.75, 128.02, 125.21, 34.79, 30.78, 26.25

1-(p-tolyl)ethan-1-one <sup>4</sup>

<sup>1</sup>H NMR (400 MHz, CDCl<sub>3</sub>): δ = 7.87 – 7.85 (m, 2H), 7.26 – 7.24 (m, 2H), 2.57 (s, 3H), 2.41 (s, 3H). <sup>13</sup>C NMR (100 MHz, CDCl<sub>3</sub>): δ = 197.50, 143.54, 134.33, 128.91, 128.10, 26.18, 21.28.

1-(m-tolyl)ethan-1-one <sup>4</sup>

<sup>1</sup>H NMR (400 MHz, CDCl<sub>3</sub>): δ = 7.75 – 7.72 (m, 2H), 7.34 – 7.32 (m, 2H), 2.56 (s, 3H), 2.38 (s, 3H). <sup>13</sup>C NMR (100 MHz, CDCl<sub>3</sub>): δ = 198.21, 138.21, 137.01, 133.77, 128.67, 128.35, 125.49, 26.55, 21.21.

1-(o-tolyl)ethan-1-one <sup>3</sup>

<sup>1</sup>H NMR (400 MHz, CDCl<sub>3</sub>): δ = 7.68 – 7.67 (m, 1H), 7.37 – 7.33 (m, 1H), 7.26 – 7.20 (m, 2H), 2.55 (s, 3H), 2.53 (s, 3H). <sup>13</sup>C NMR (100 MHz, CDCl<sub>3</sub>): δ = 201.60, 138.38, 137.44, 132.02, 131.52, 129.40, 125.70, 29.48, 21.60.

1-(4-ethylphenyl)ethan-1-one <sup>4</sup>

<sup>1</sup>H NMR (400 MHz, CDCl<sub>3</sub>): δ = 7.89 – 7.87 (m, 2H), 7.29 – 7.27 (m, 2H), 2.73 – 2.67 (q, 2H), 2.57 (s, 3H), 1.27 – 1.23 (t, 3H). <sup>13</sup>C NMR (100 MHz, CDCl<sub>3</sub>): δ = 198.07, 150.26, 135.12, 128.76, 128.27, 29.15, 26.76, 15.43.

1-(4-methoxyphenyl)ethan-1-one <sup>4</sup>

<sup>1</sup>H NMR (400 MHz, CDCl<sub>3</sub>): δ = 7.93 – 7.91 (m, 2H), 6.92 – 6.90 (m, 2H), 3.84 (s, 3H), 2.53 (s, 3H). <sup>13</sup>C NMR (100 MHz, CDCl<sub>3</sub>): δ = 196.88, 163.63, 130.72, 130.42, 113.82, 55.58, 26.46.

1-(2-methoxyphenyl)ethan-1-one <sup>4</sup>

<sup>1</sup>H NMR (400 MHz, CDCl<sub>3</sub>): δ = 7.71 – 7.69 (m, 1H), 7.43 – 7.39 (m, 1H), 6.95 – 6.90 (m, 2H), 3.84 (s, 3H), 2.57 (s, 3H). <sup>13</sup>C NMR (100 MHz, CDCl<sub>3</sub>): δ = 199.83, 159.11, 133.91, 130.41, 128.26, 120.63, 111.80, 55.59, 32.01.

1-(4-fluorophenyl)ethan-1-one <sup>4</sup>

<sup>1</sup>H NMR (400 MHz, CDCl<sub>3</sub>): δ = 8.0 – 7.97 (m, 2H), 7.15 – 7.11 (m, 2H), 2.59 (s, 3H). <sup>13</sup>C NMR (100 MHz, CDCl<sub>3</sub>): δ = 196.67, 165.94 (d, *J*<sub>C-F</sub> = 254 Hz), 133.76 (d, *J*<sub>C-F</sub> = 3.0 Hz), 131.13 (d, *J*<sub>C-F</sub> = 9.0 Hz), 115.83 (d, *J*<sub>C-F</sub> = 22 Hz), 26.71.

1-(4-chlorophenyl)ethan-1-one <sup>4</sup>

<sup>1</sup>H NMR (400 MHz, CDCl<sub>3</sub>): δ = 7.93 – 7.91 (m, 2H), 7.47 – 7.45 (m, 2H), 2.62 (s, 3H). <sup>13</sup>C NMR (100 MHz, CDCl<sub>3</sub>): δ = 196.71, 139.40, 135.26, 129.62, 128.75, 26.45.

1-(2-chlorophenyl)ethan-1-one

<sup>1</sup>H NMR (400 MHz, CDCl<sub>3</sub>): δ = 7.55 – 7.53 (m, 1H), 7.41 – 7.29 (m, 3H), 2.64 (s, 3H). <sup>13</sup>C NMR (100 MHz, CDCl<sub>3</sub>): δ = 200.32, 138.94, 131.91, 131.13, 130.52, 129.29, 126.83, 30.58.

1-(4-bromophenyl)ethan-1-one <sup>4</sup>

<sup>1</sup>H NMR (400 MHz, CDCl<sub>3</sub>): δ = 7.83 – 7.81 (m, 2H), 7.61 – 7.59 (m, 2H), 2.59 (s, 3H). <sup>13</sup>C NMR (100 MHz, CDCl<sub>3</sub>): δ = 197.26, 136.00, 132.11, 130.07, 128.53, 26.79.

1-(3-aminophenyl)ethan-1-one <sup>4</sup>

<sup>1</sup>H NMR (400 MHz, CDCl<sub>3</sub>): δ = 7.32 – 7.20 (m, 3H), 6.87 – 6.85 (m, 1H), 3.88 (s, 2H), 2.55 (s, 3H). <sup>13</sup>C NMR (100 MHz, CDCl<sub>3</sub>): δ = 198.53, 146.78, 138.08, 129.35, 119.60, 118.67, 113.91, 26.65.

Acetyl Ferrocene <sup>5</sup>

<sup>1</sup>H NMR (400 MHz, CDCl<sub>3</sub>): δ = 4.77 (s, 2H), 4.51 (s, 2H), 4.21 (s, 5H), 2.40 (s, 3H). <sup>13</sup>C NMR (100 MHz, CDCl<sub>3</sub>): δ = 202.16, 72.29, 69.80, 69.54, 27.38.

1,2-diphenylethan-1-one <sup>4</sup>

<sup>1</sup>H NMR (400 MHz, CDCl<sub>3</sub>): δ = 8.01 – 7.99 (m, 2H), 7.54 – 7.51 (m, 1H), 7.45 – 7.41 (m, 2H), 7.33 – 7.21 (m, 5H), 4.26 (s, 2H). <sup>13</sup>C NMR (100 MHz, CDCl<sub>3</sub>): δ = 197.37, 136.27, 134.25, 132.91, 129.20, 128.39, 128.37, 128.34, 126.01, 45.21.

2-phenyl-1-(p-tolyl)ethan-1-one <sup>6</sup>



$^1\text{H}$  NMR (400 MHz,  $\text{CDCl}_3$ ):  $\delta$  = 2.30 (s, 3H), 4.22 (s, 2H), 7.10 – 7.15 (m, 4H), 7.40 – 7.44 (m, 2H), 7.50 – 7.52 (m, 1H), 7.98 – 8.00 (m, 2H).  $^{13}\text{C}$  NMR (100 MHz,  $\text{CDCl}_3$ ):  $\delta$  = 197.79, 136.52, 136.42, 133.05, 131.35, 129.34, 129.25, 128.56, 45.07, 21.03

1-(4-chlorophenyl)-2-phenylethan-1-one <sup>7</sup>

$^1\text{H}$  NMR (400 MHz,  $\text{CDCl}_3$ ):  $\delta$  = 4.25 (s, 2H), 7.24 – 7.35 (m, 5H), 7.41 – 7.44 (m, 2H), 7.93 – 7.96 (m, 2H).  $^{13}\text{C}$  NMR (100 MHz,  $\text{CDCl}_3$ ):  $\delta$  = 196.46, 139.65, 134.83, 134.18, 130.07, 129.40, 128.99, 128.79, 127.07, 45.56

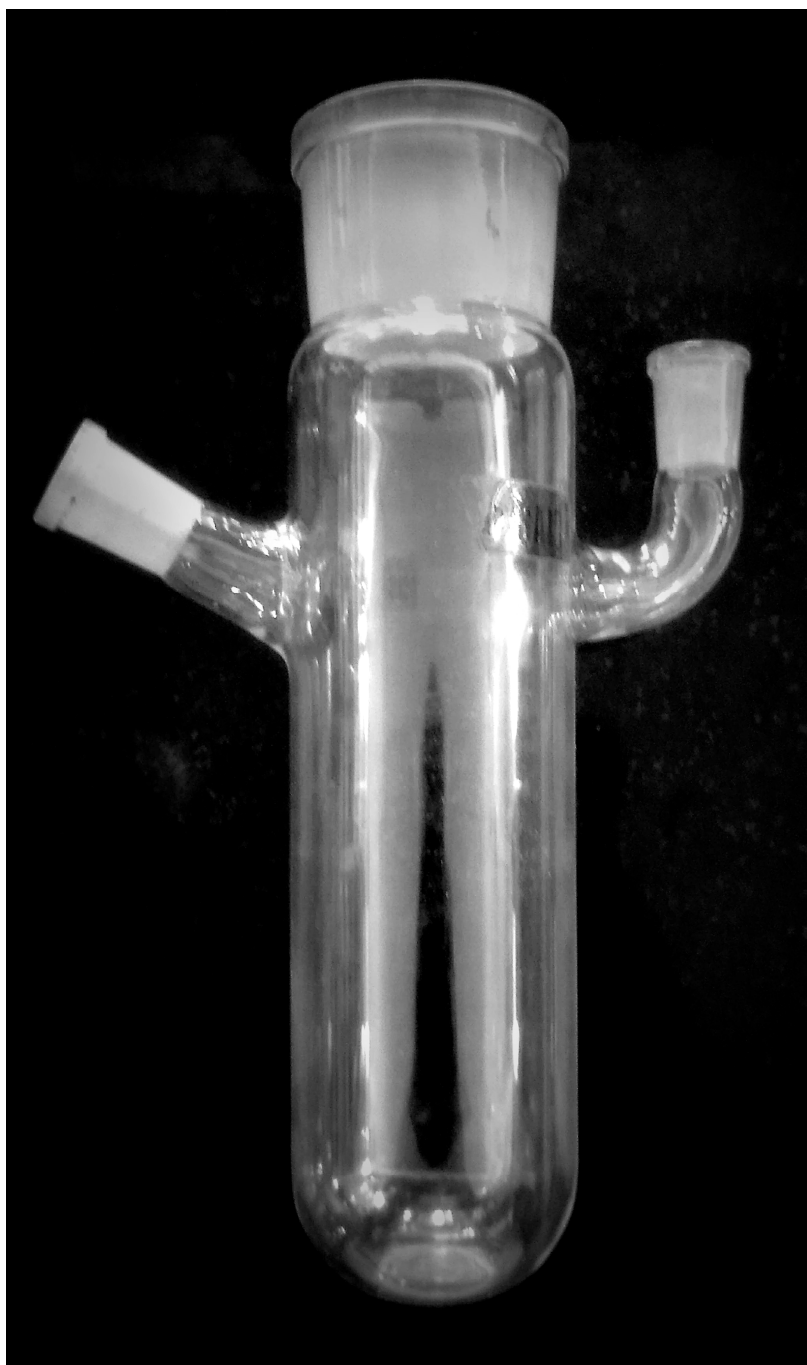

**Figure S1. Photochemical reactor (Capacity 100 mL)**

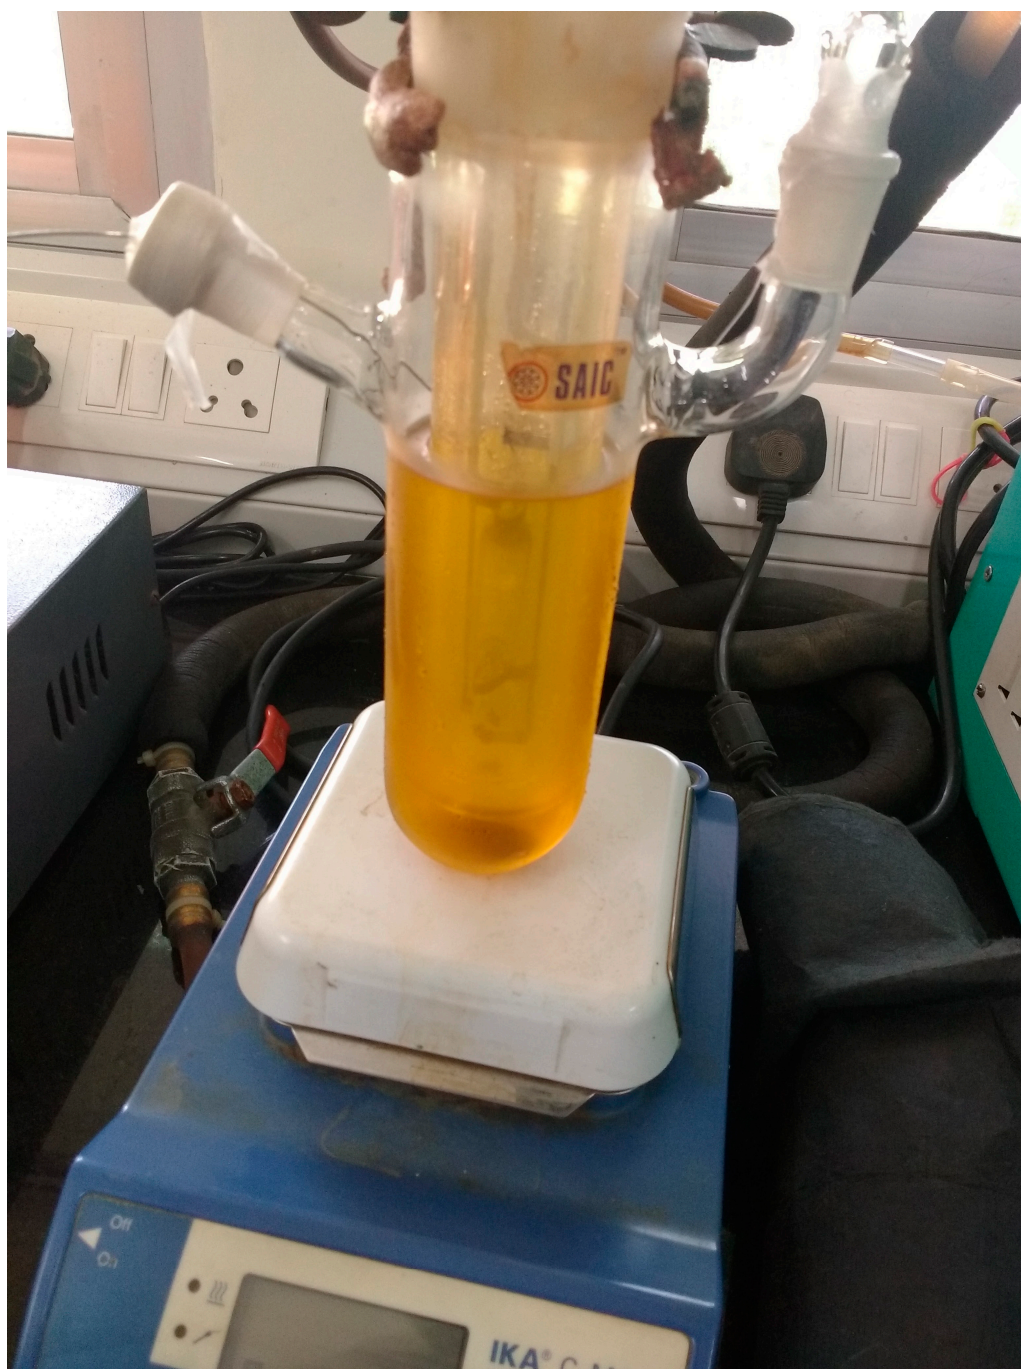

**Figure S2. Reaction setup for photochemical reactor**

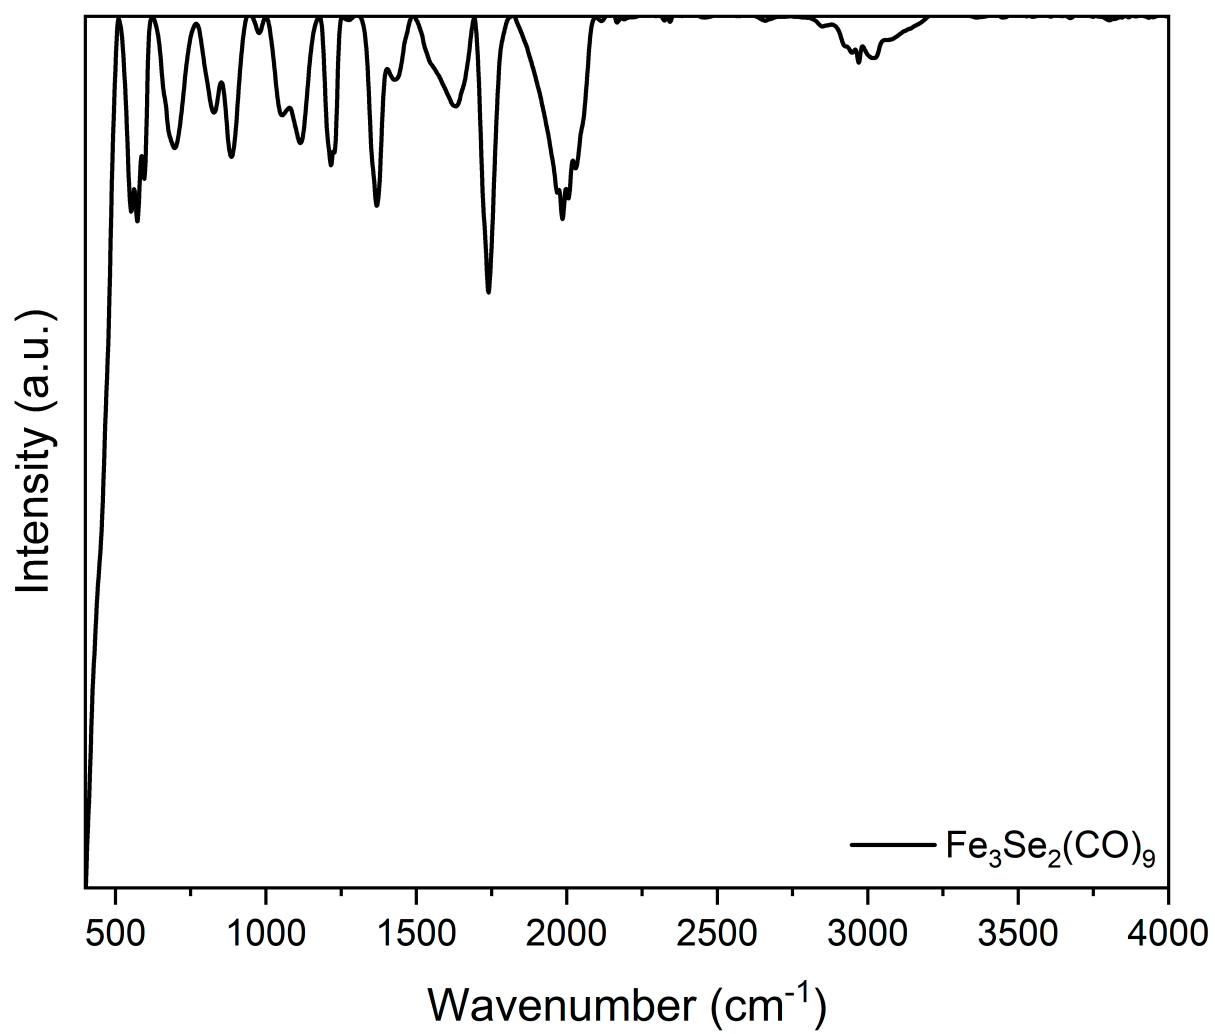

**Figure S3. FTIR of  $\text{Fe}_3\text{Se}_2(\text{CO})_9$  catalyst**

a

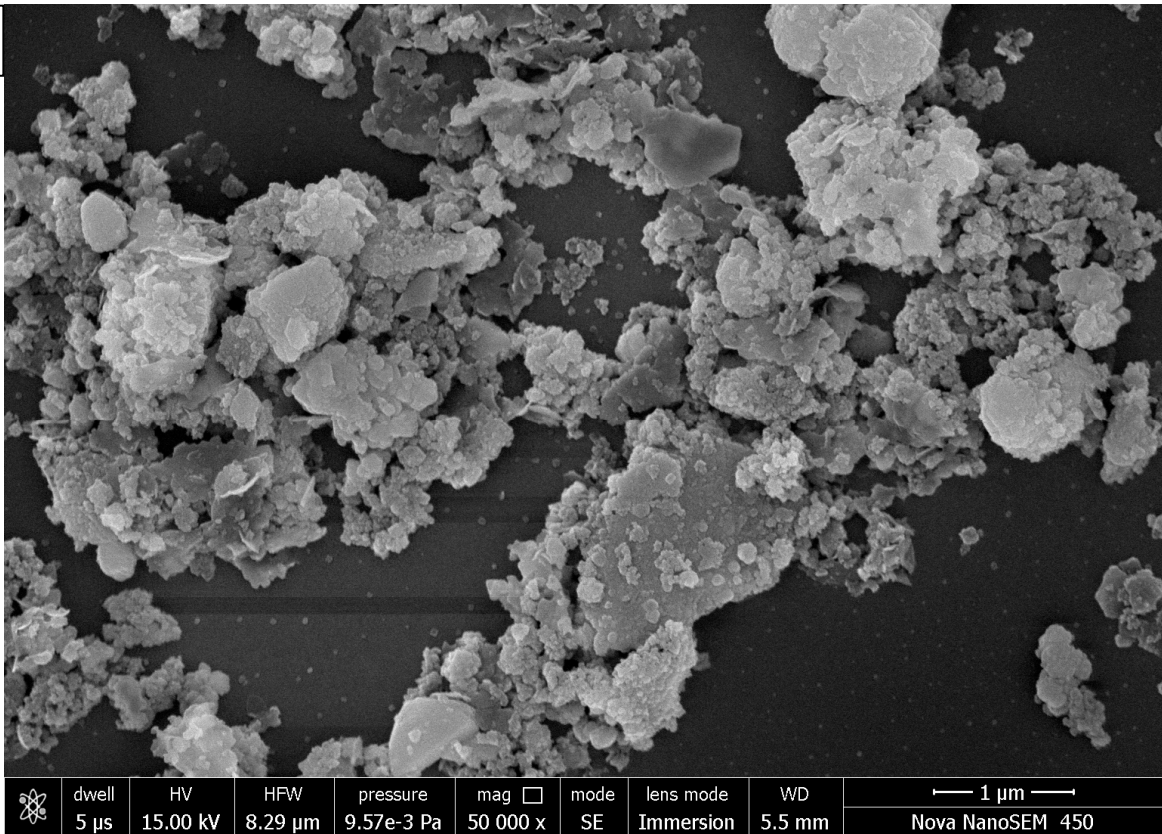

b

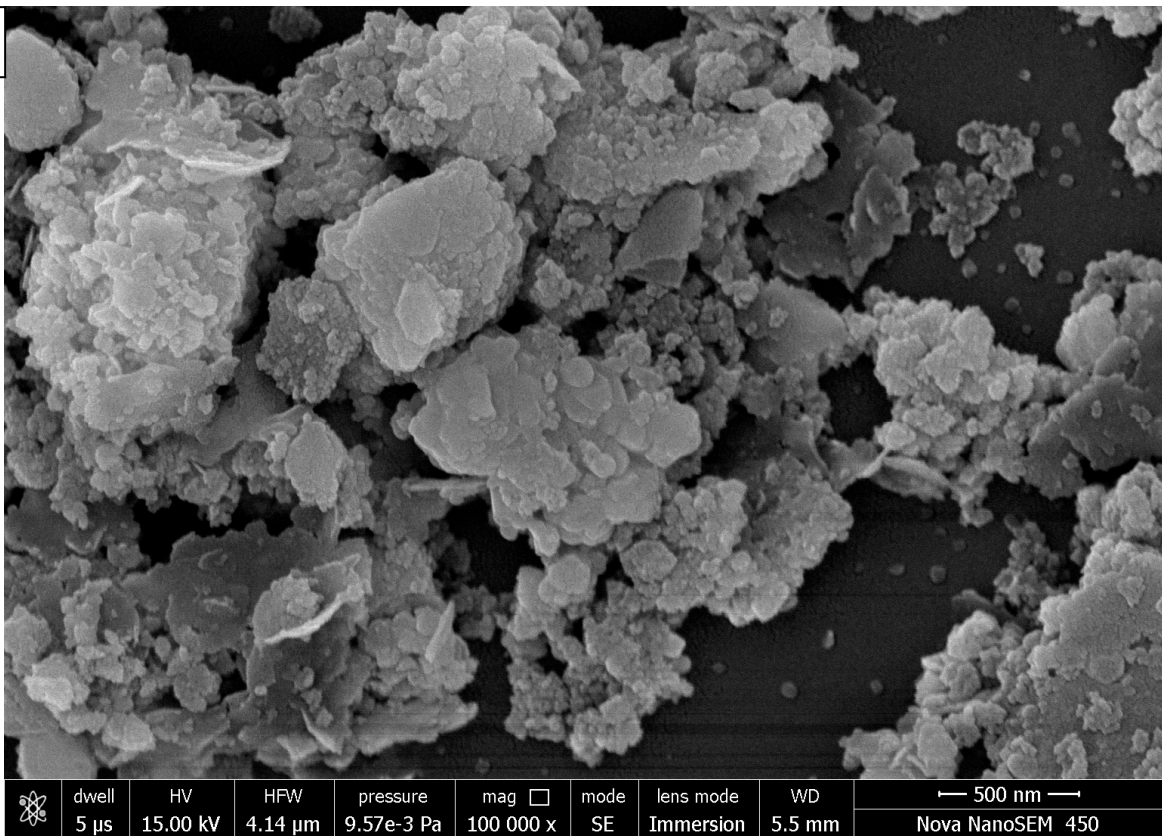



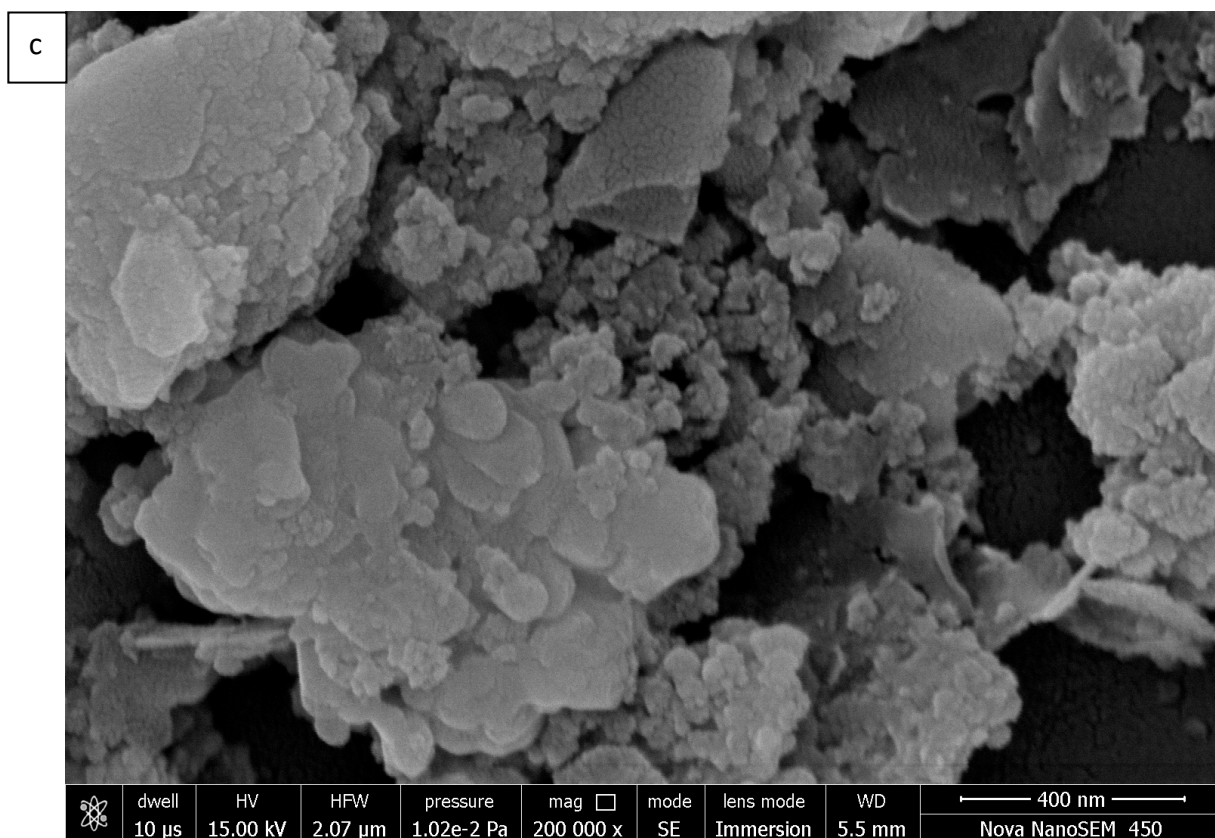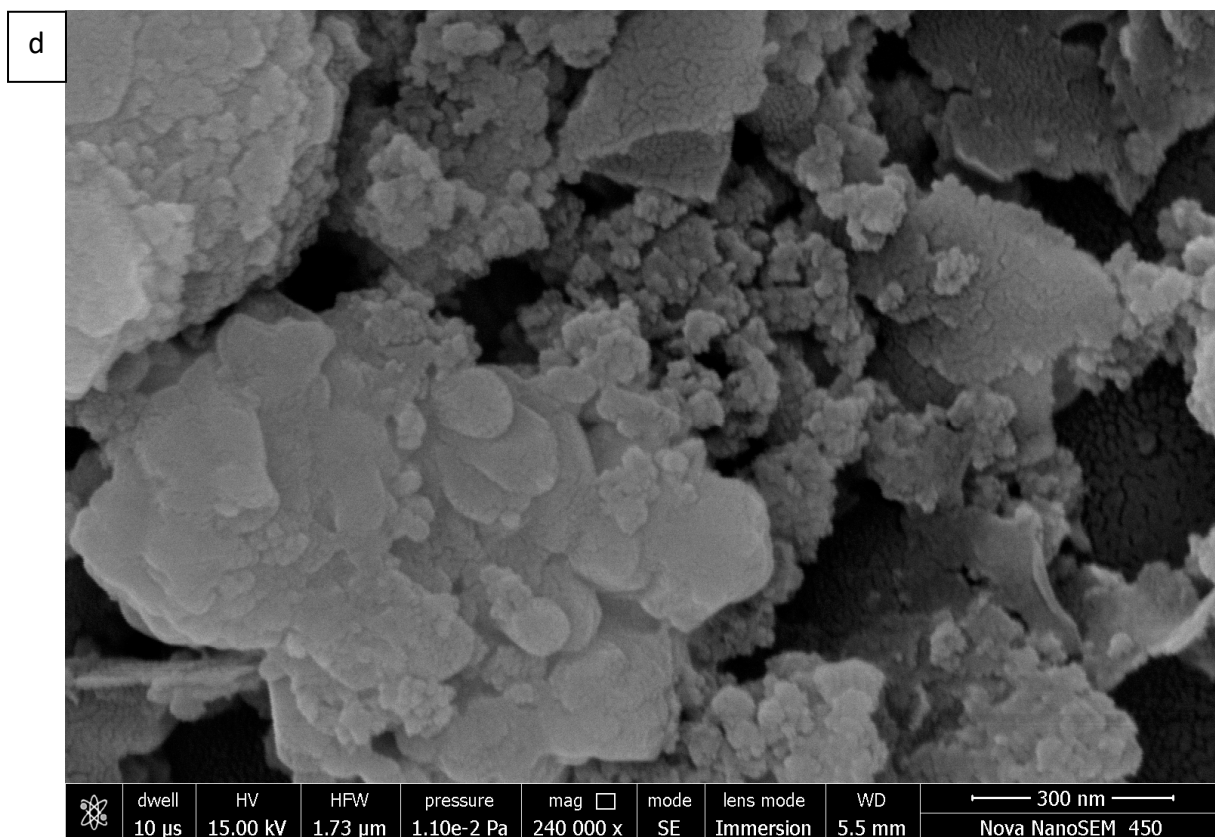

**Figure S4 (a - d).** FESEM images of FeSe nanoparticles.

a

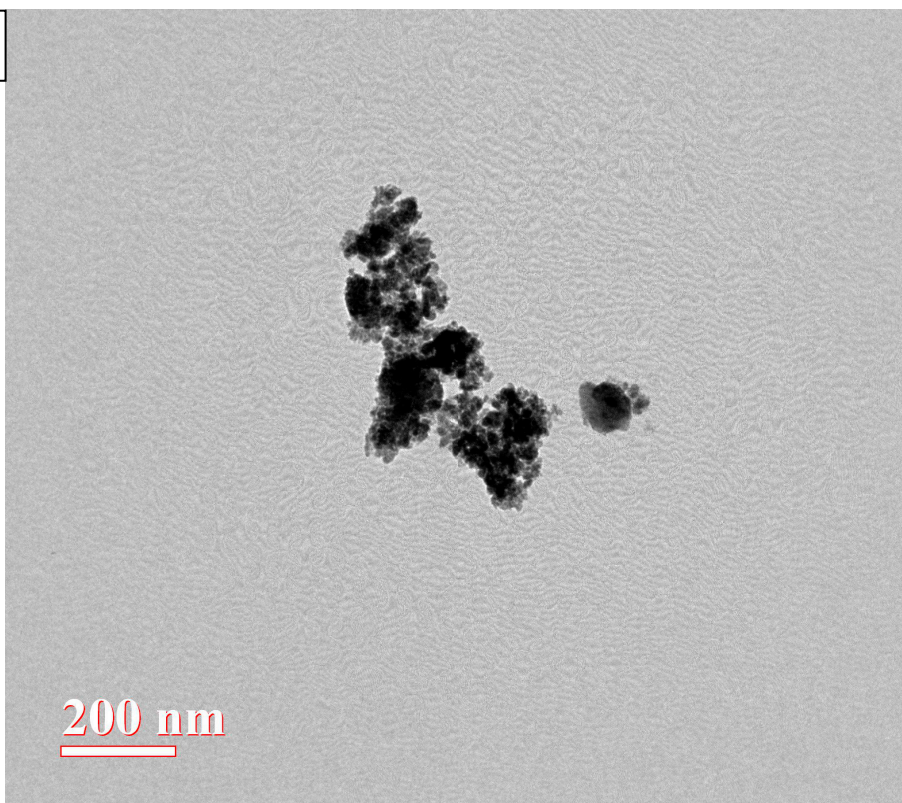

b

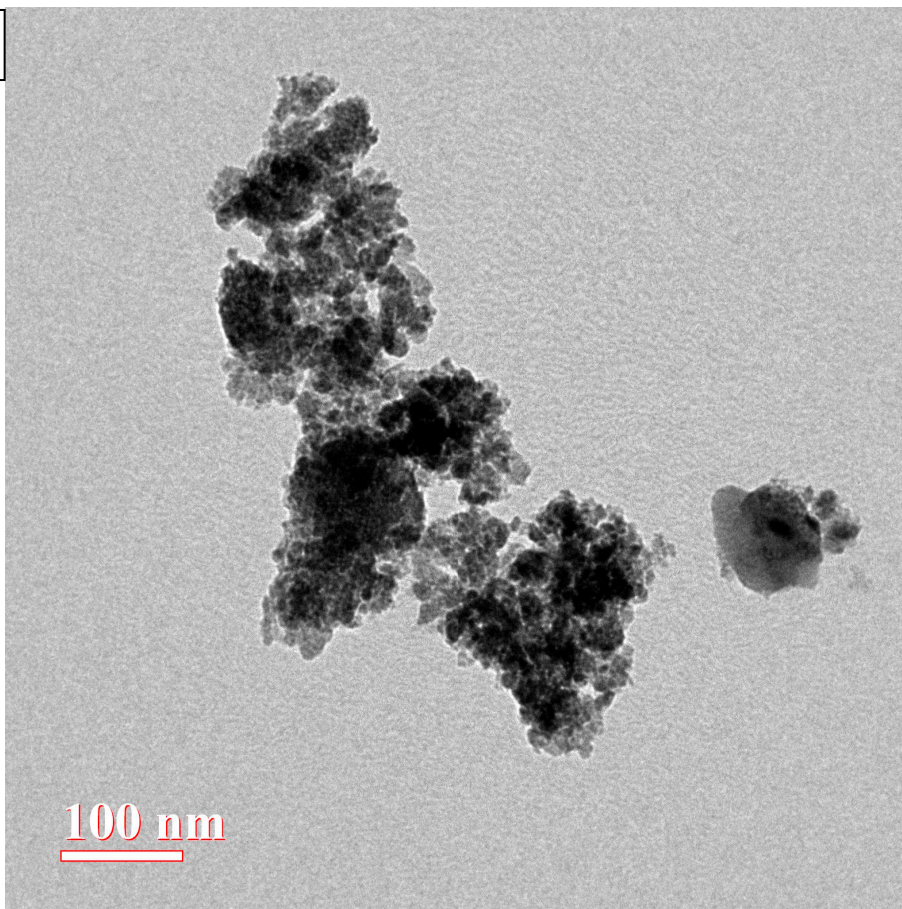



c

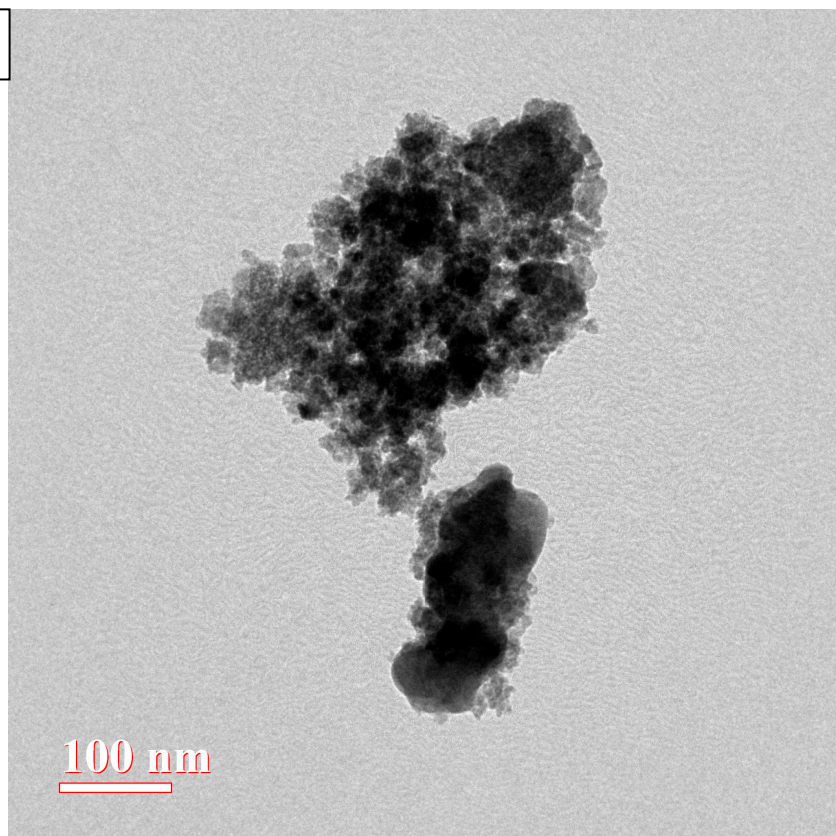

d

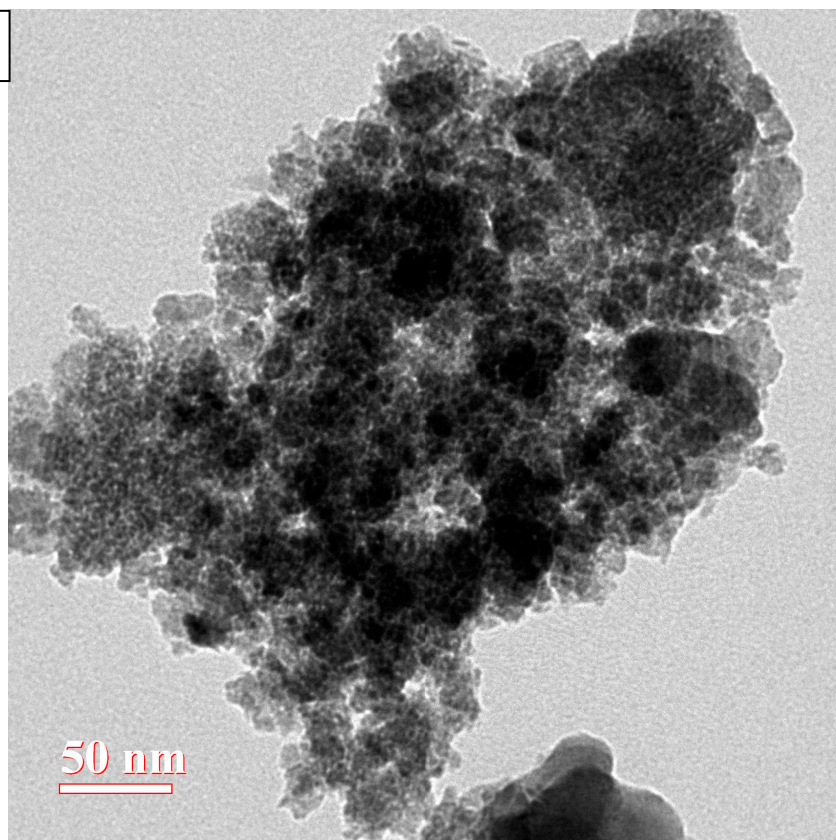



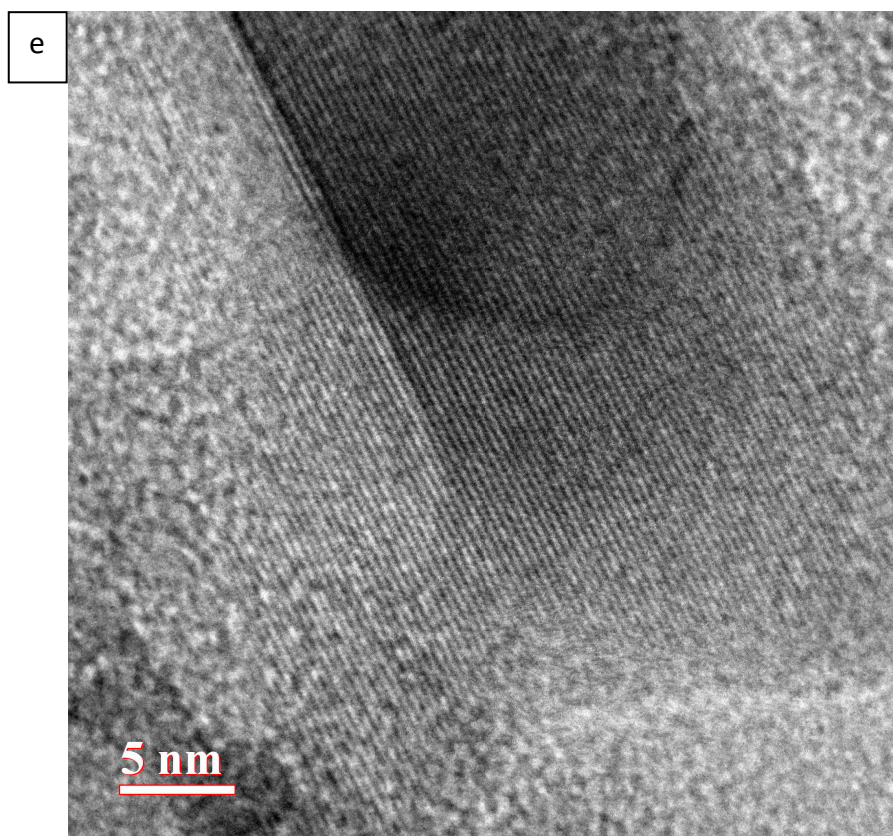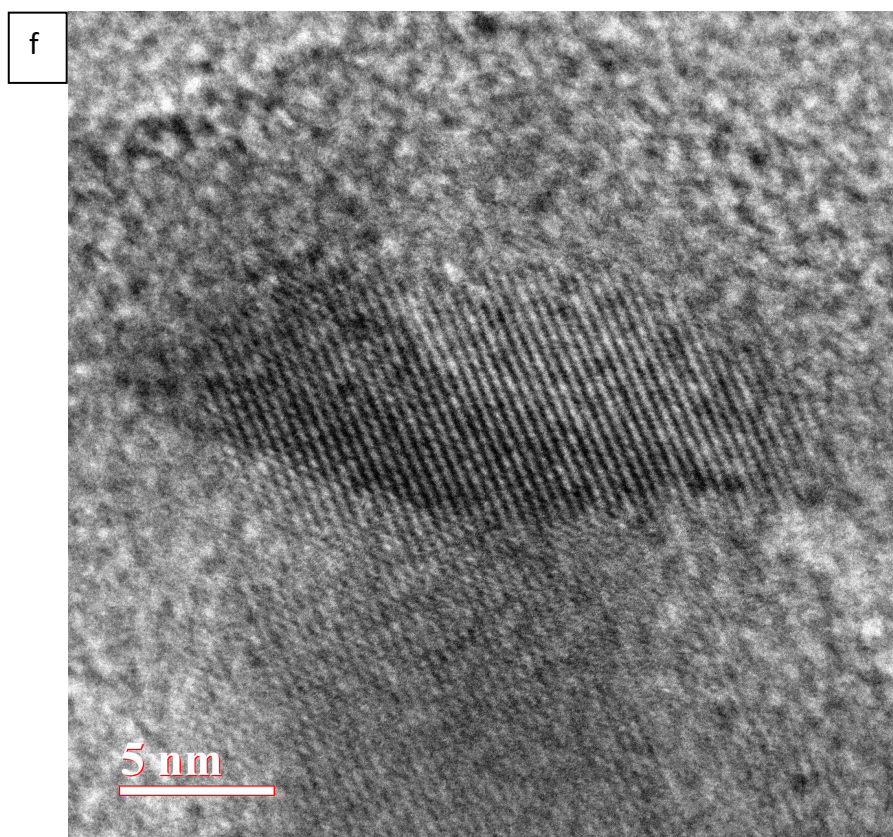

**Figure S5 (a - f).** TEM images of FeSe nanoparticles

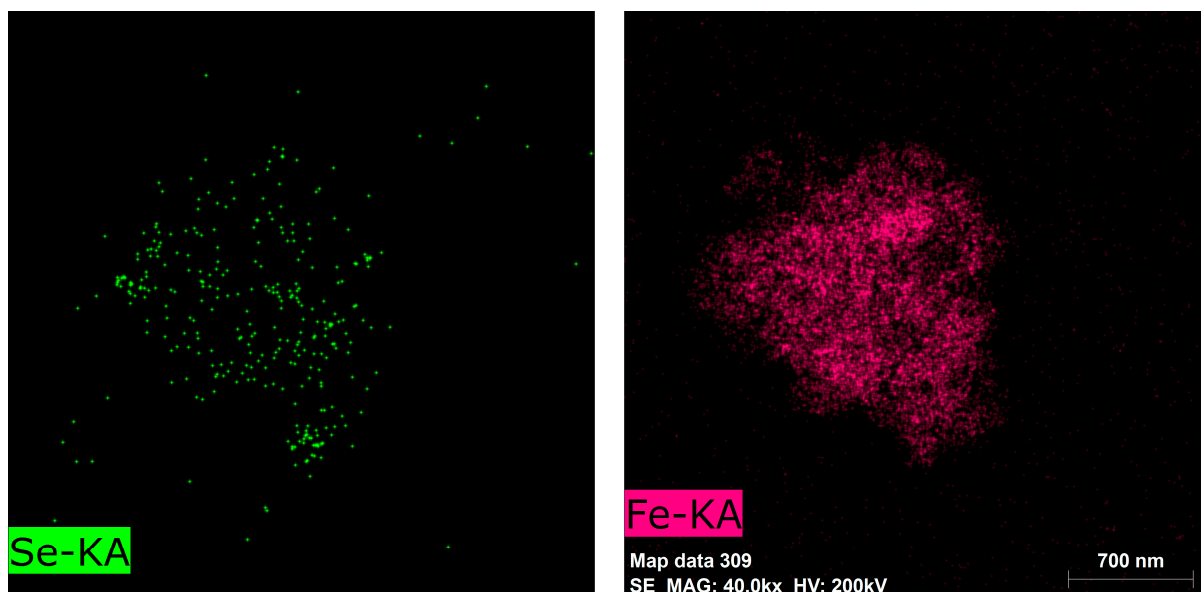

**Figure S6.** Elemental mapping of FeSe nanoparticles

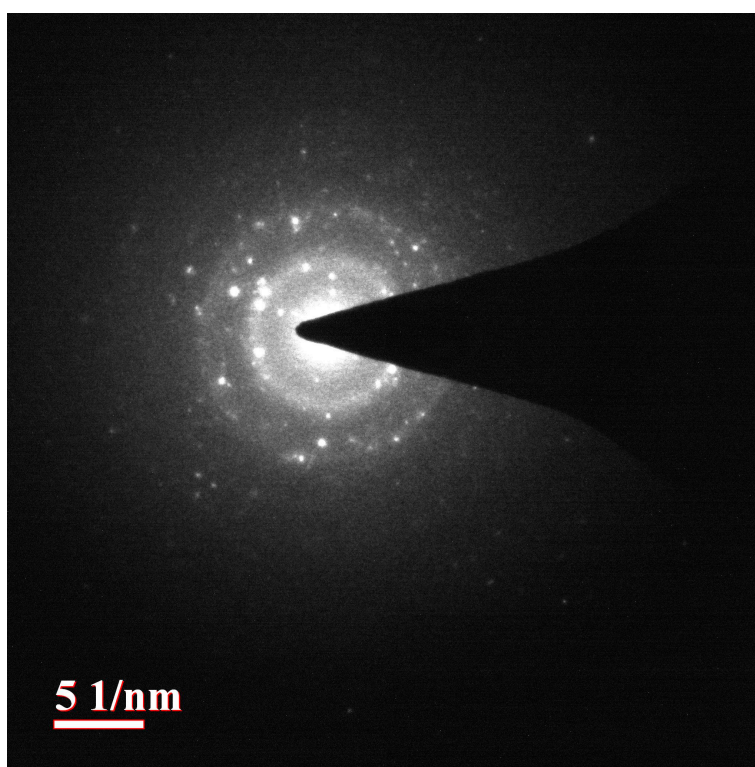

**Figure S7.** SAED pattern FeSe nanoparticles

**Table S1:** Comparison Table

| Entry      | Metal catalyst      | Catalyst (mol%) | Solvent      | Temp. (°C) | Time (h)    | condition ( $\Delta$ , $h\nu$ , MW) | Yield (%) | Ref.      |
|------------|---------------------|-----------------|--------------|------------|-------------|-------------------------------------|-----------|-----------|
| 1.         | Hg(II)              | 5               | MeCN         | rt         | 12          | $\Delta$                            | 100       | 7         |
| 2.         | Sn-W                | 50              | cycloocatane | 100        | 0.5 - 24    | $\Delta$                            | 91        | 4         |
| 3.         | Co(III)             | 2               | MeOH         | 80         | 5 – 36      | $\Delta$                            | 99        | 9         |
| 4.         | Fe(III)             | 10              | DCE          | 75         | 67          | $\Delta$                            | 96        | 2         |
| 5.         | Ag(I)               | 10              | MeOH         | 75         | 36 – 48     | $\Delta$                            | 94        | 10        |
| 6.         | Pt(II)              | 0.8             | THF          | 60         | 12          | $\Delta$                            | 55:45     | 11        |
| 7.         | Rh(III)             | 4               | THF          | 110        | 16 – 24     | $\Delta$                            | 93        | 12        |
| 8.         | Rh(I)               | 5               | THF          | 110        | 2           | $\Delta$                            | 100       | 13        |
| 9.         | Rh(III)             | 20              | MeOH         | rt         | 12          | $h\nu$                              | 91        | 14        |
| 10.        | Ru(I)               | 1 – 5           | IPA          | 100        | 12 – 36     | $\Delta$                            | 99        | 15        |
| 11.        | Ru(II)              | 5               | PEG-400      | rt         | 12 – 48     | $\Delta$                            | 89        | 16        |
| 12.        | Pd(II)              | 5               | MeOH         | 50         | 1 – 51      | $\Delta$                            | 99        | 17        |
| 13.        | Au(I)               | 0.1             | Dioxane      | 120        | 18          | $\Delta$                            | 97        | 18        |
| 14.        | Au-TiO <sub>2</sub> | 1               | Dioxane      | 120        | 1           | mw                                  | 97        | 19        |
| 15.        | Au(III)             | 1.6 – 4.5       | MeOH         | 70         | 1.5 – 4     | $\Delta$                            | 98        | 20        |
| 16.        | Rh(I)               | 1.5             | MeOH         | -5         | 0.5         | $h\nu$                              | 85        | 21        |
| 17.        | Fe(III)             | 100             | DCM          | rt         | 24          | $\Delta$                            | 92        | 22        |
| 18.        | Fe(II)              | 5               | DCE          | 60         | 1           | $\Delta$                            | 92        | 23        |
| 19.        | Fe(III)             | 10              | Dioxane      | 80         | 20          | $\Delta$                            | 96        | 24        |
| 20.        | Fe(III)             | 9               | AcOH         | 95         | 24          | $\Delta$                            | 99        | 25        |
| 21.        | Cu(I)               | 1               | HCl          | rt         | 24          | $h\nu$                              | 91        | 26        |
| <b>22.</b> | <b>Fe(0)</b>        | <b>5</b>        | <b>Water</b> | <b>-5</b>  | <b>0.42</b> | <b><math>h\nu</math></b>            | <b>86</b> | <b>--</b> |

In comparison to the previous reports this presented catalyst have shown better activity in many terms. This catalyst required in comparatively low quantity for the presented reaction. This catalyst produces excellent yields with wide functional group compatibility at very low temperature and takes minimum time in comparison to other catalysts. Moreover, this catalysis methodology is time and energy efficient. The presented catalyst behaves as a heterogeneous catalyst in aqueous media. While comparing the reusability of the present catalyst, there were two heterogeneous (Table 4, Entry 2 and Entry 14) and one homogeneous (Table 4, Entry 16) reusable catalyst are reported earlier, this catalyst is an example of heterogeneous reusable catalyst in aqueous media. This will be the first report presenting iron chalcogenide carbonyl complex as a catalyst for hydrations of alkynes, which can produce promising results up to four straight catalytic cycles, it can be easily separated through filtration and no activation is required for the next catalytic cycle. While the previous catalysts had shown activity up to 3, 4 and 7 cycles respectively. (Table 3 Entry 2, 14 and 16)

Most of the iron-based catalysts reported earlier are non-reusable and performs reaction in organic media. While, this catalyst is the first ever example of performing alkyne hydration under neat reaction condition. Moreover, highly stable iron chalcogenide carbonyl complex was used for catalysis.

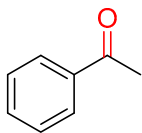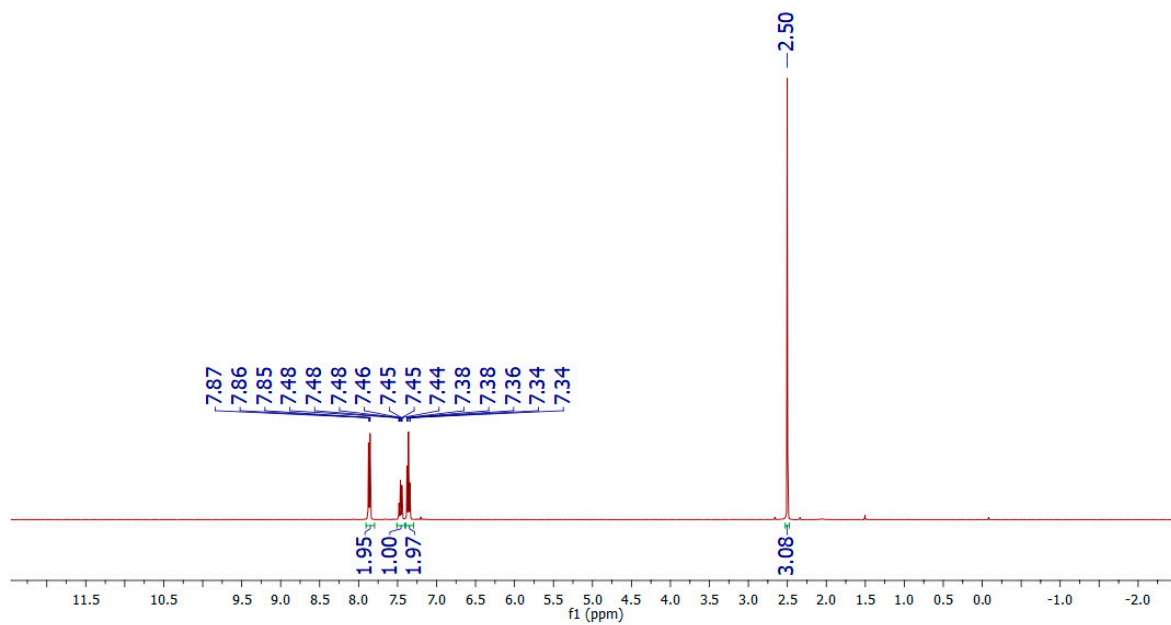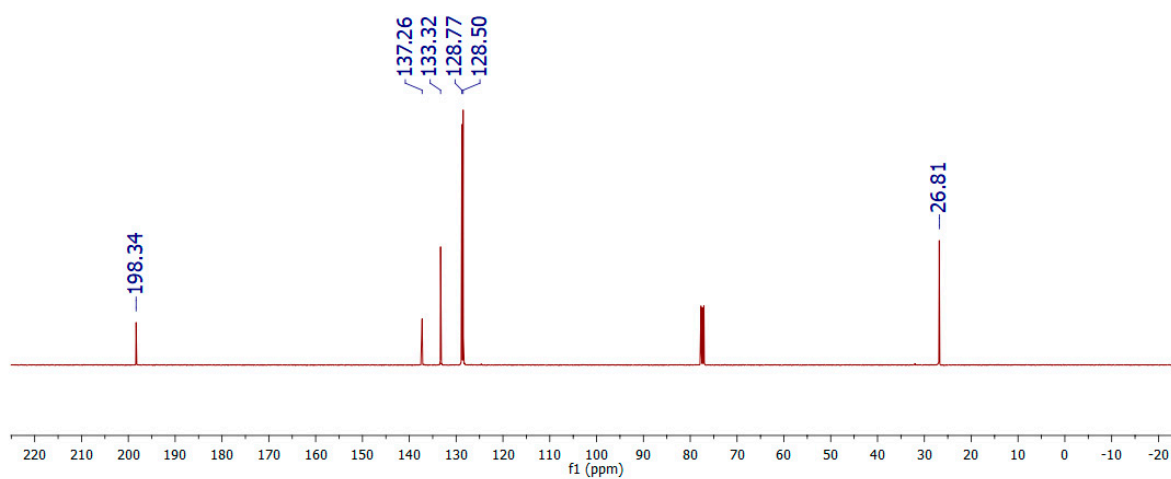

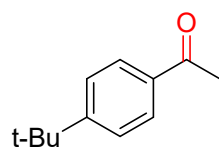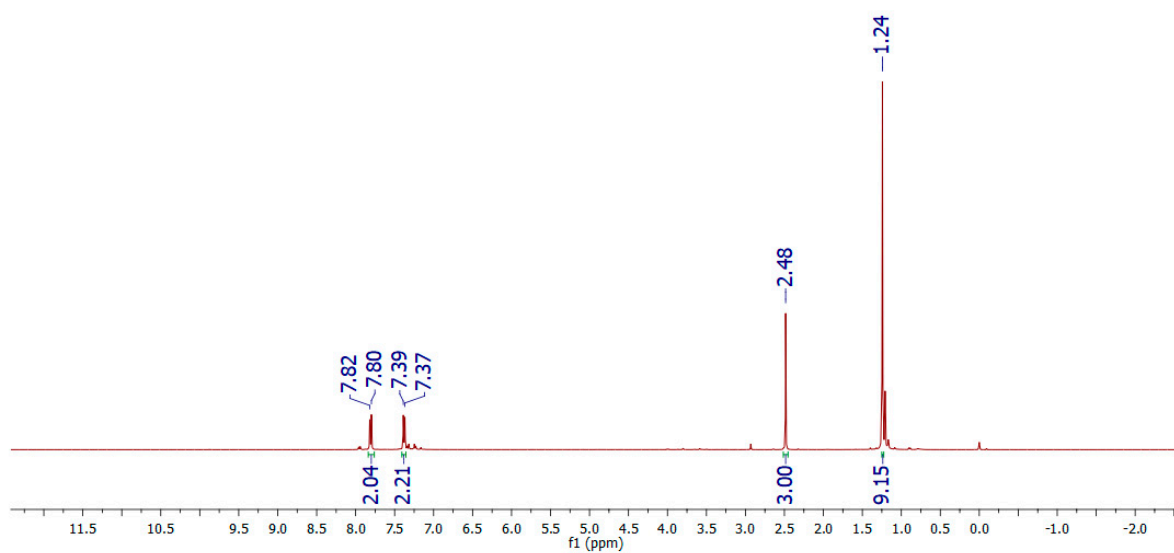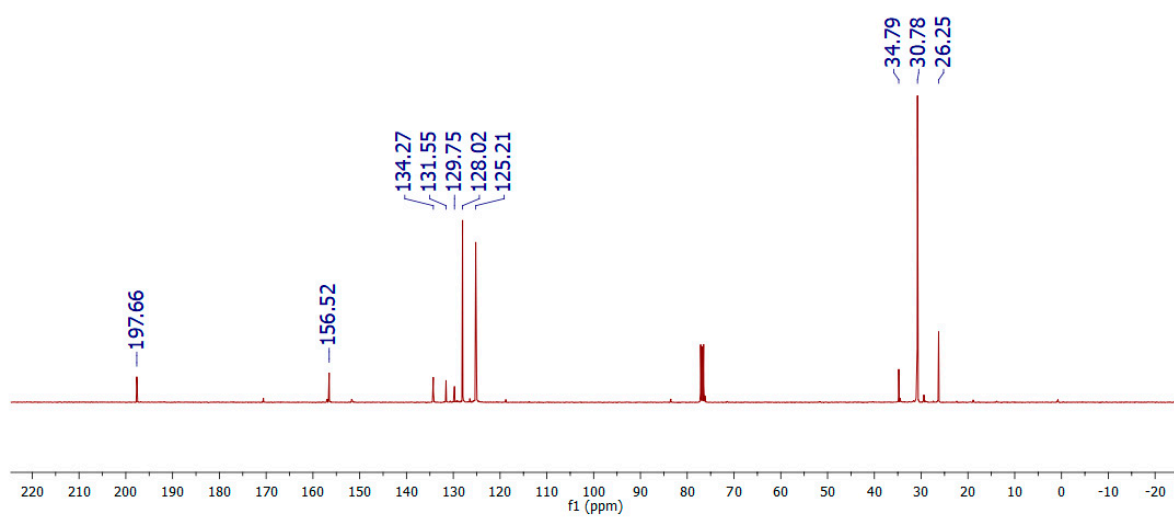



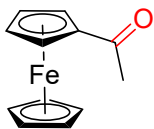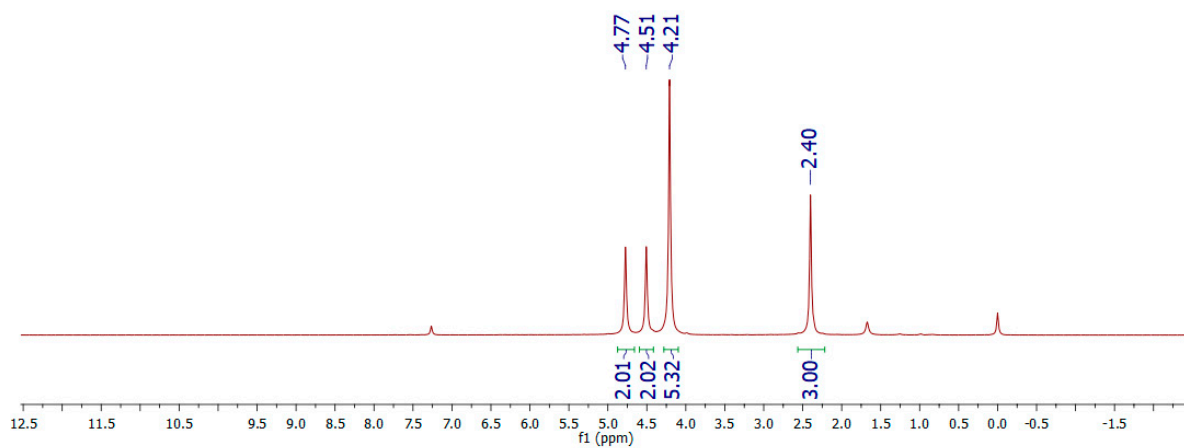

202.16

72.29  
69.80  
69.54

27.38

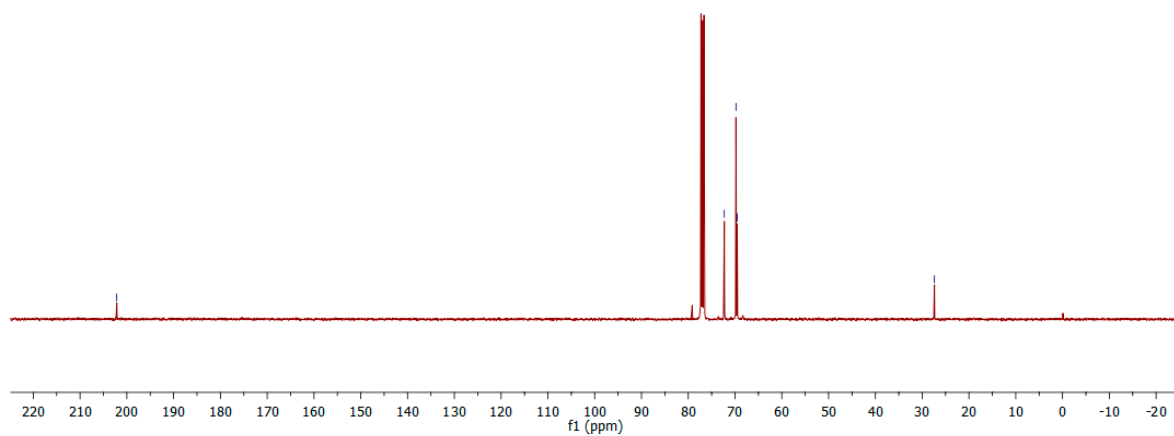

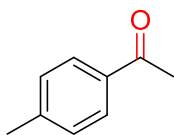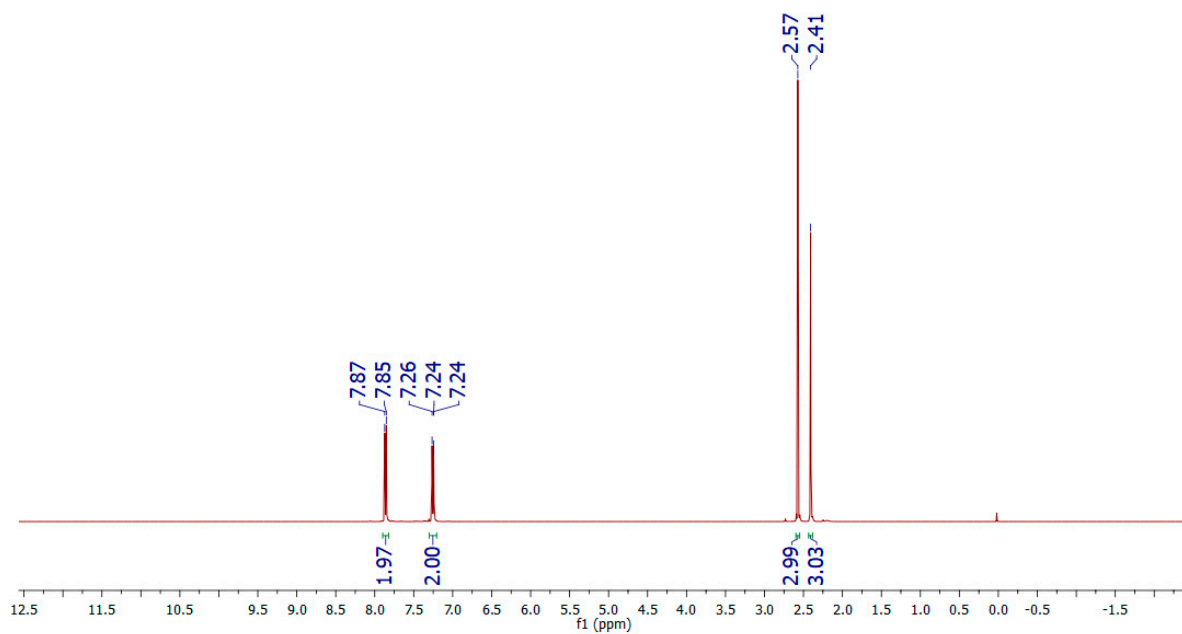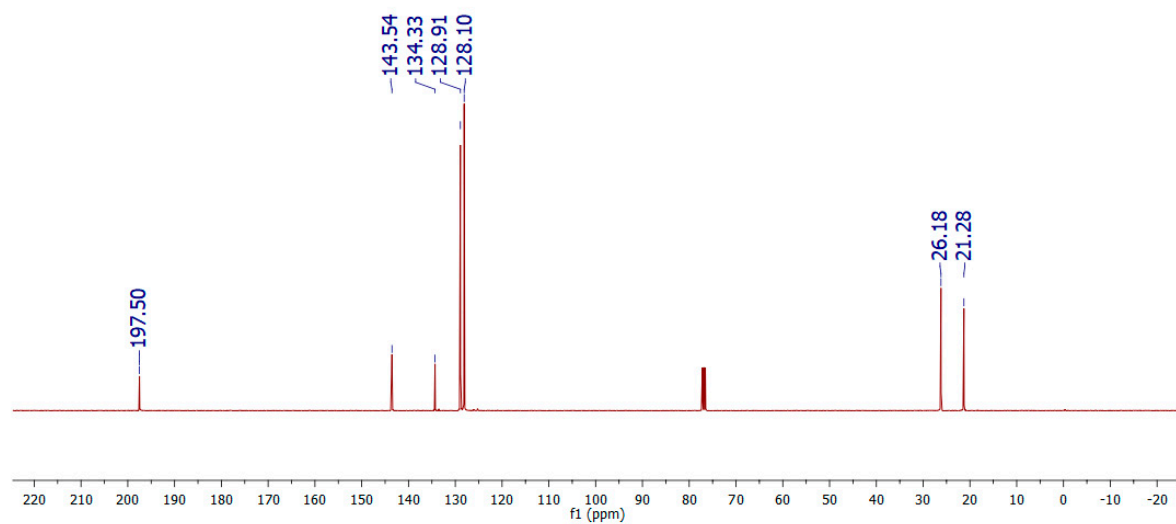

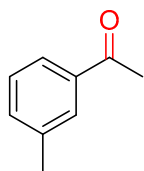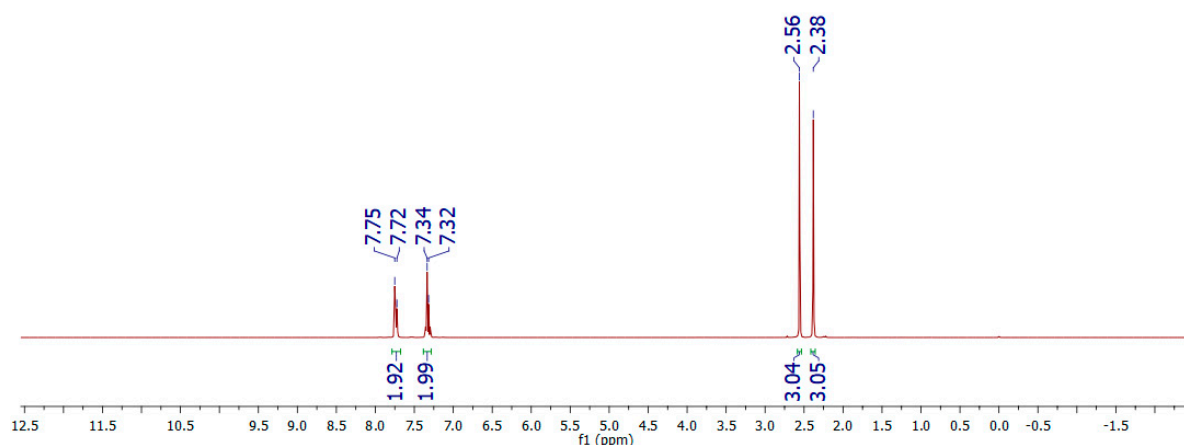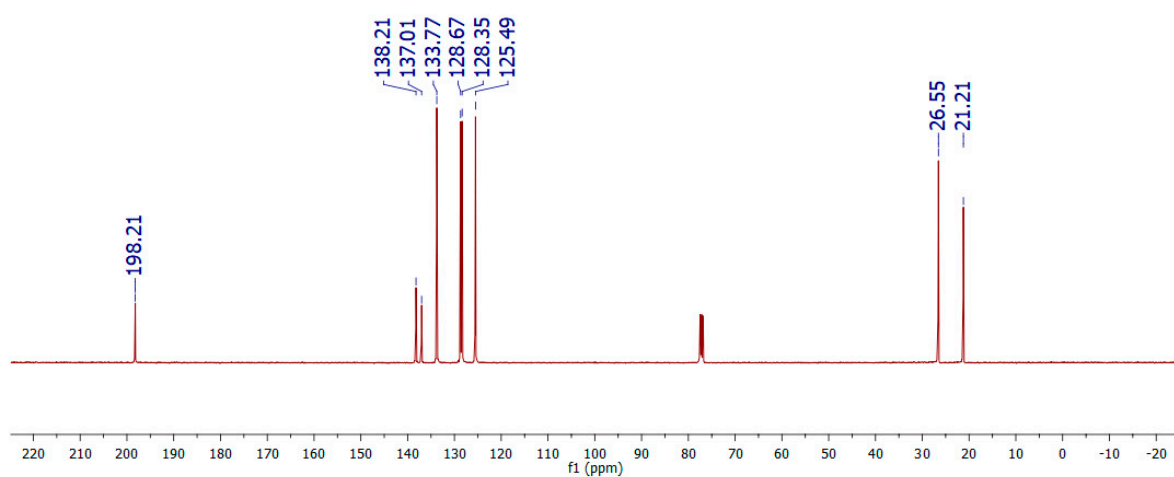



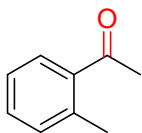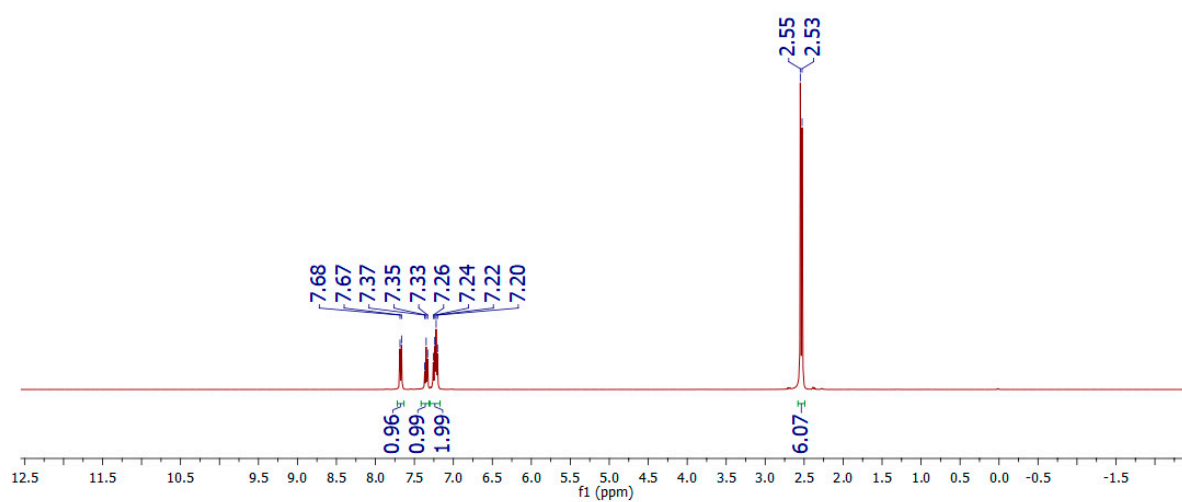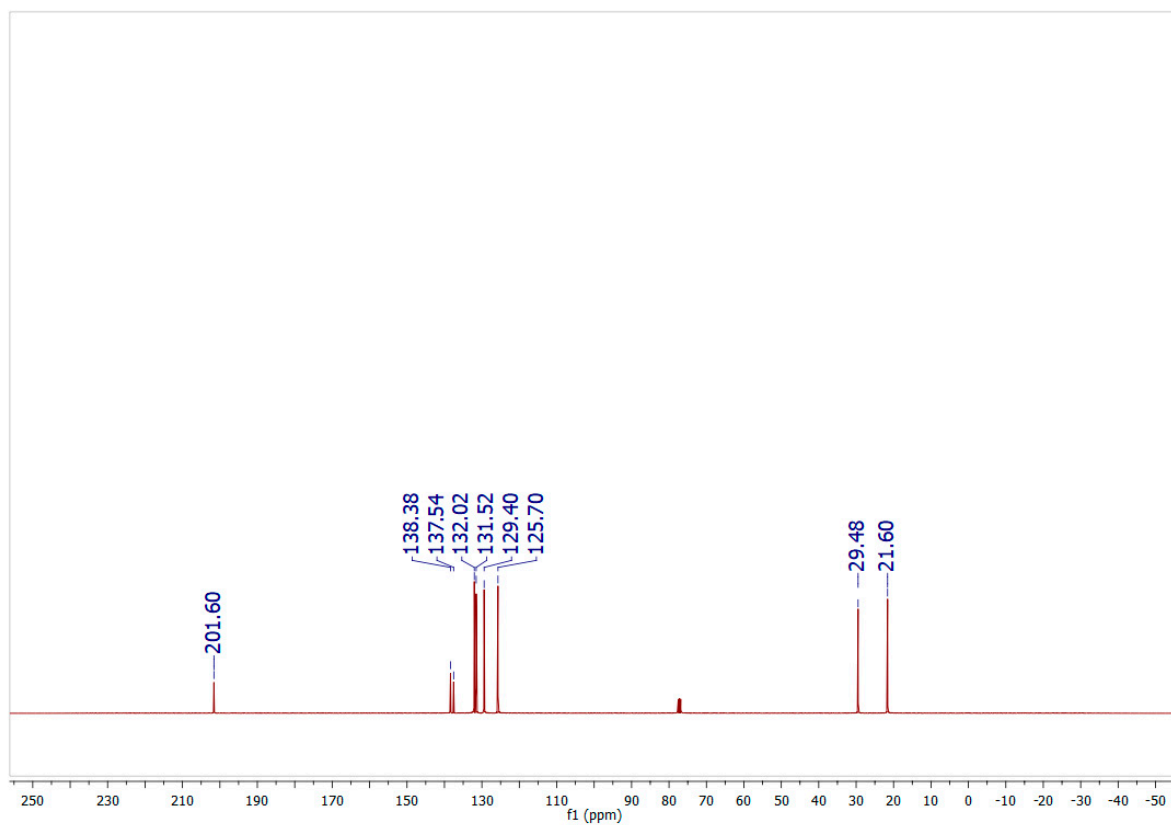

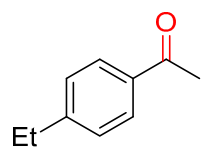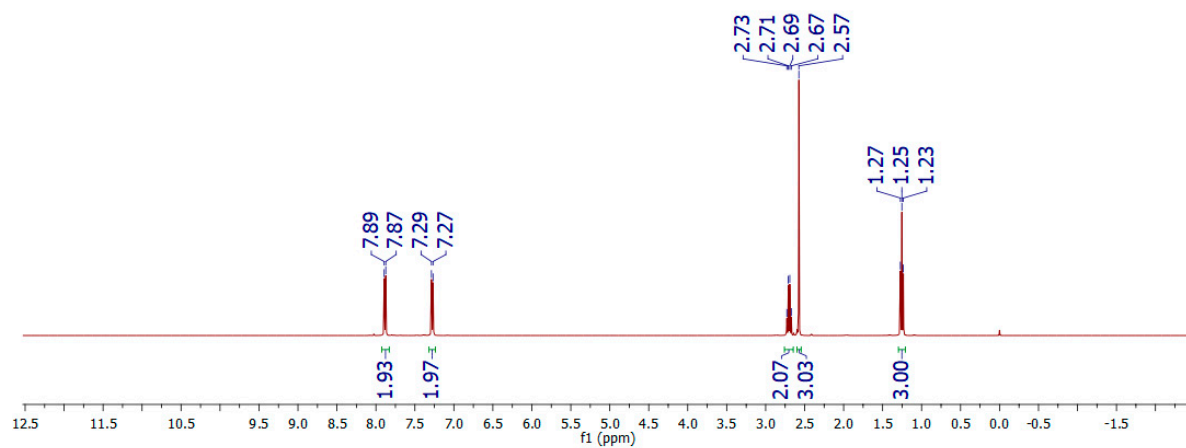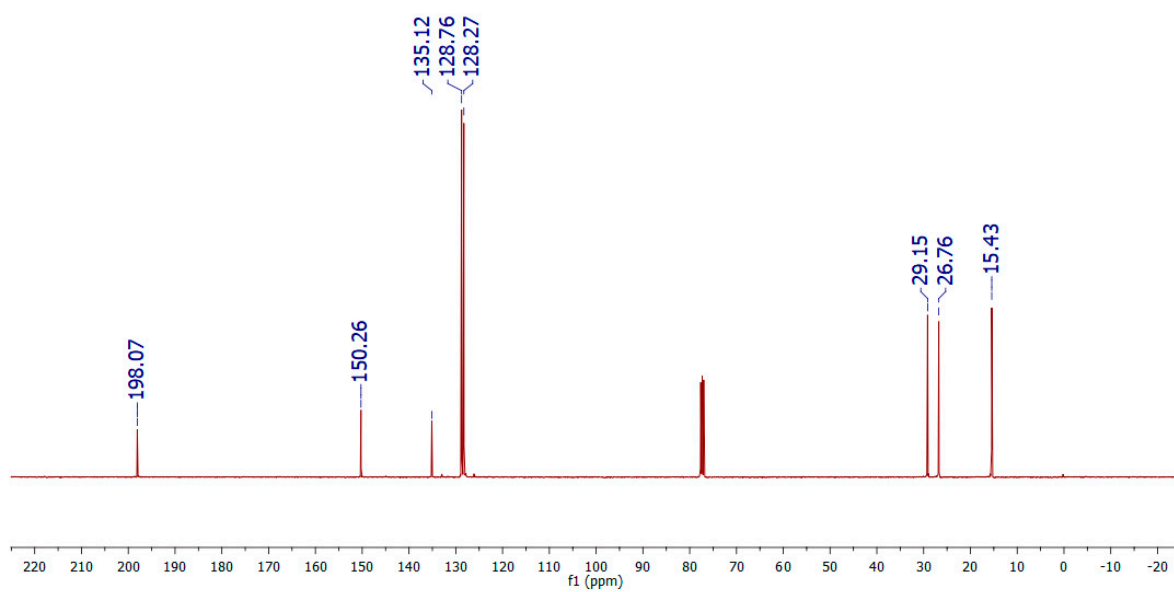

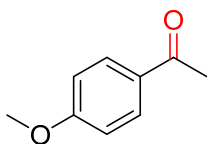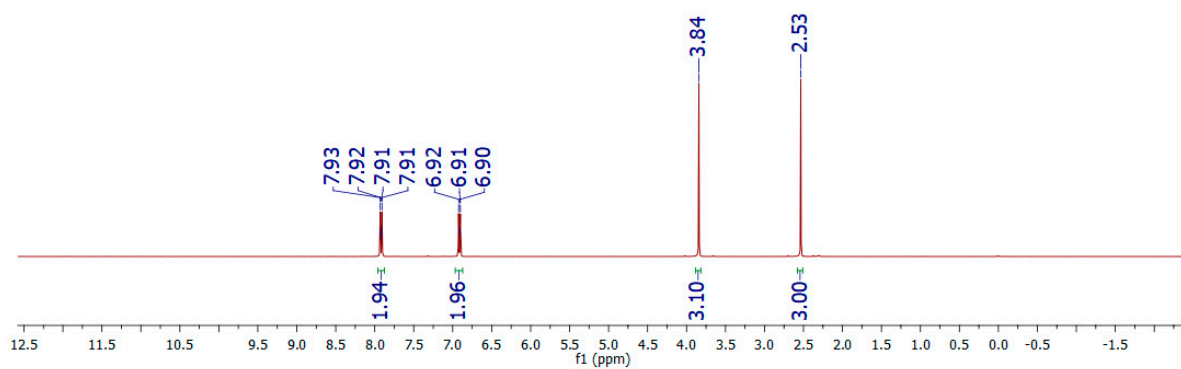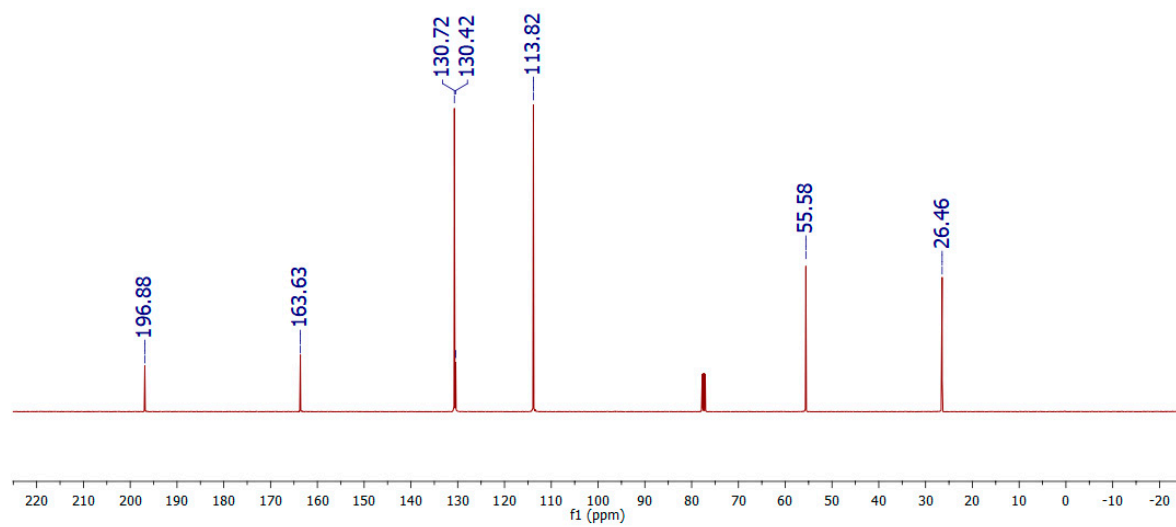

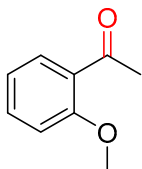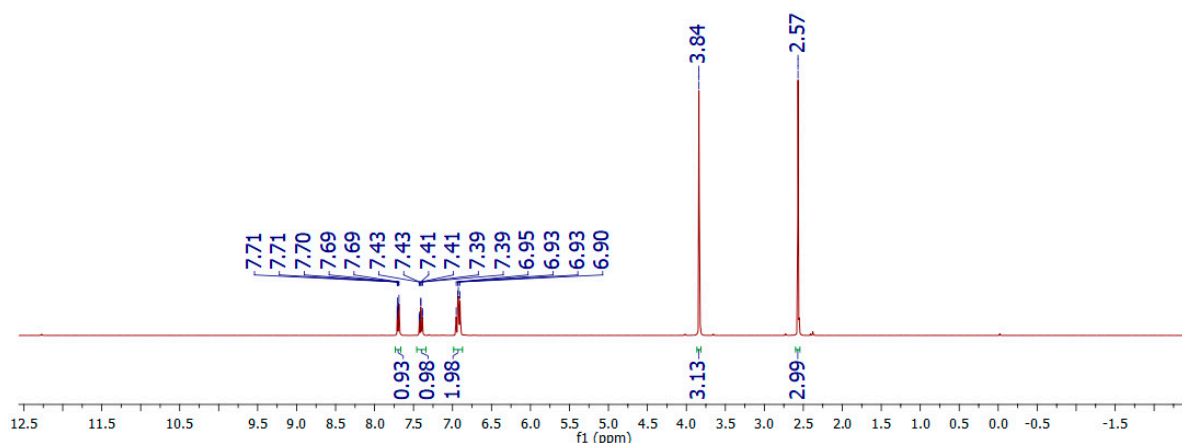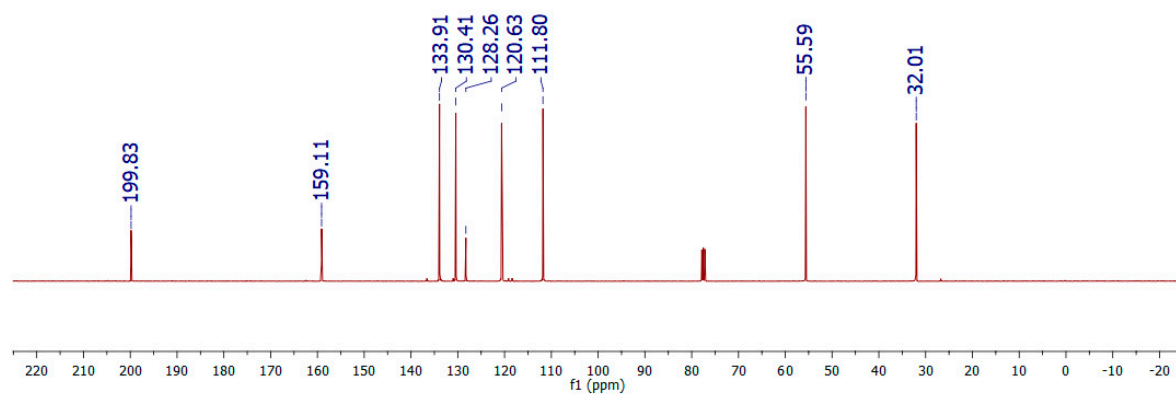

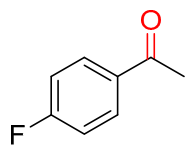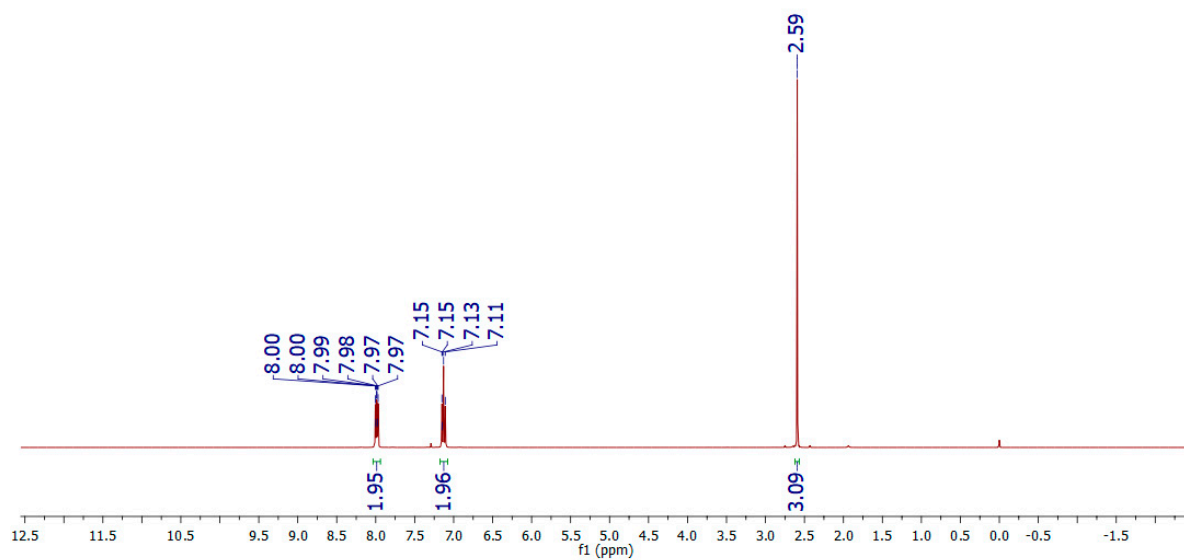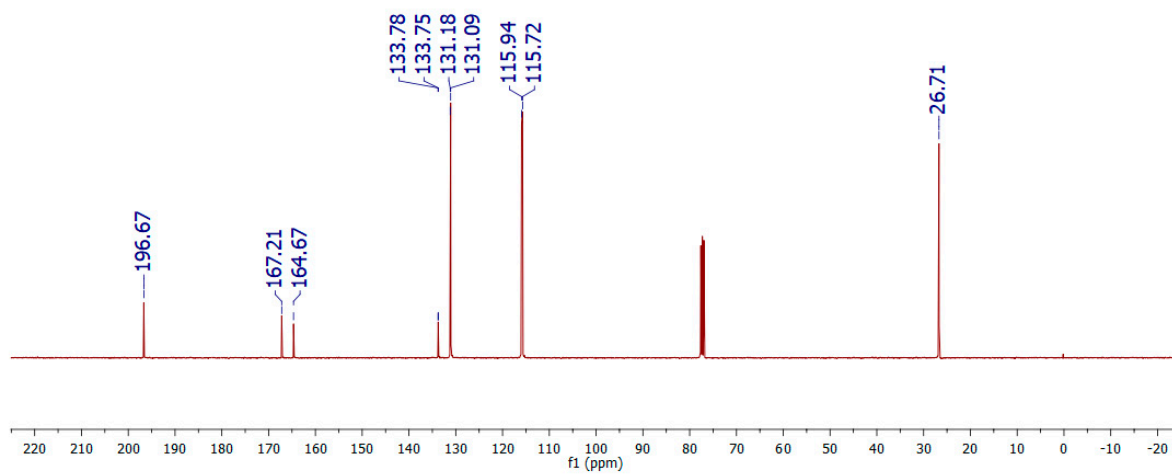

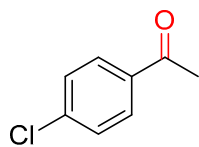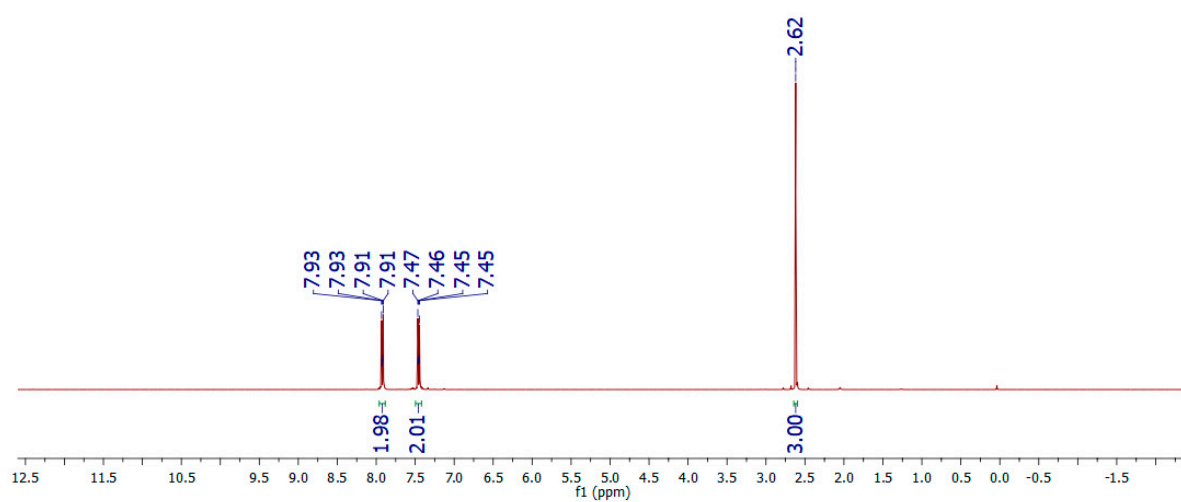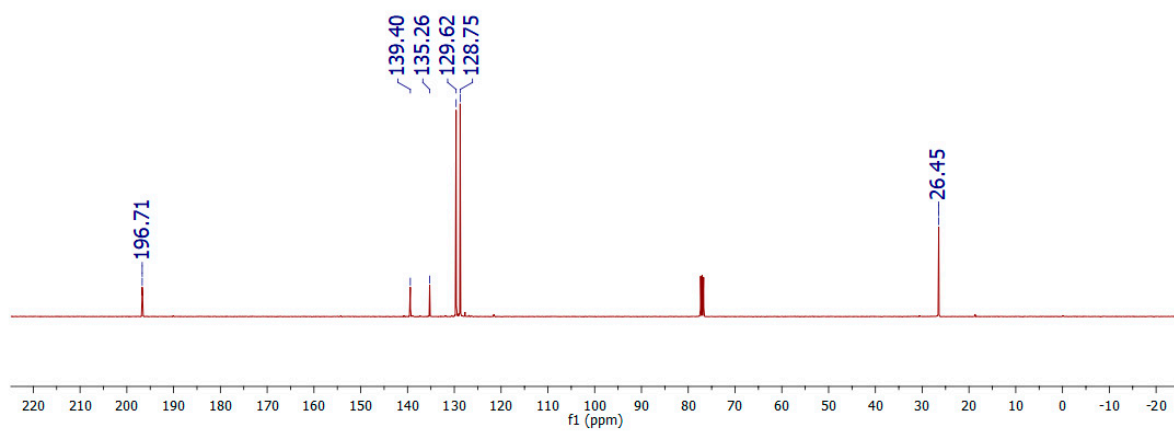

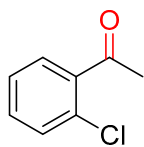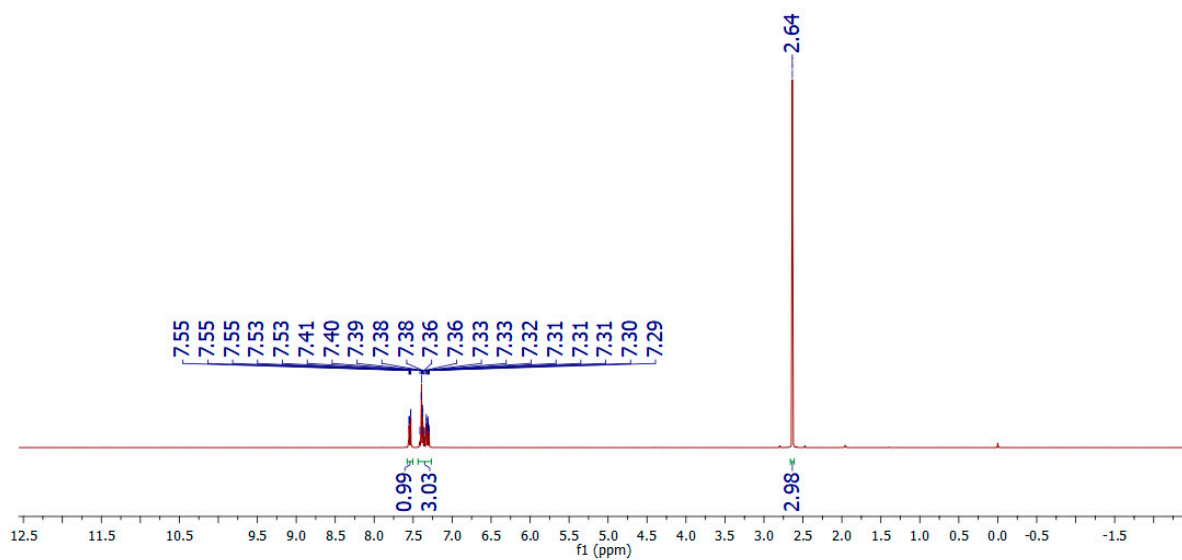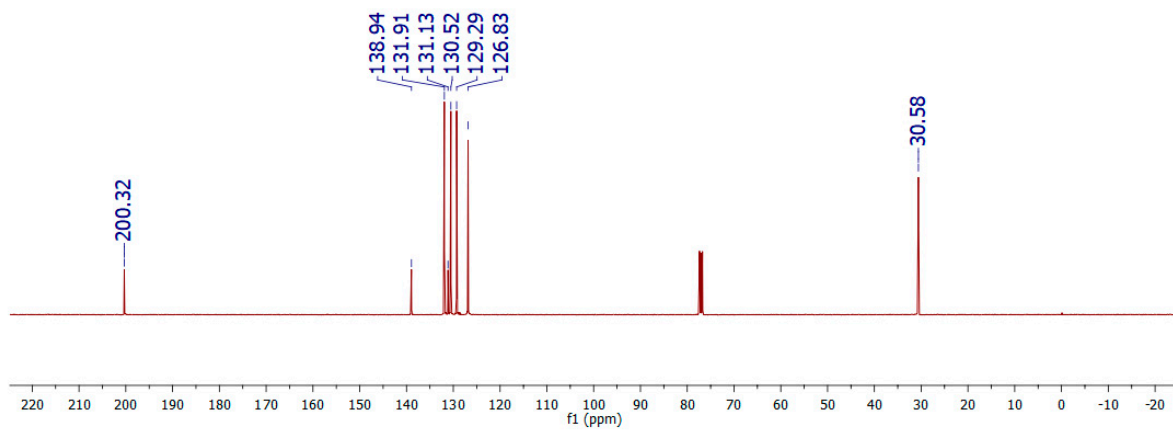

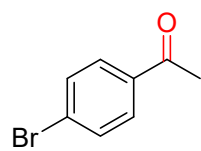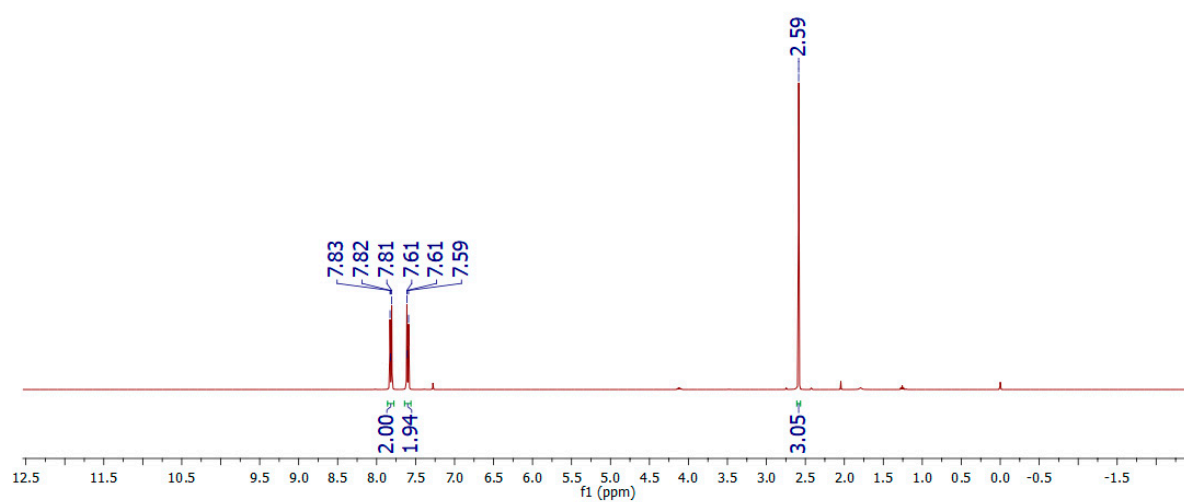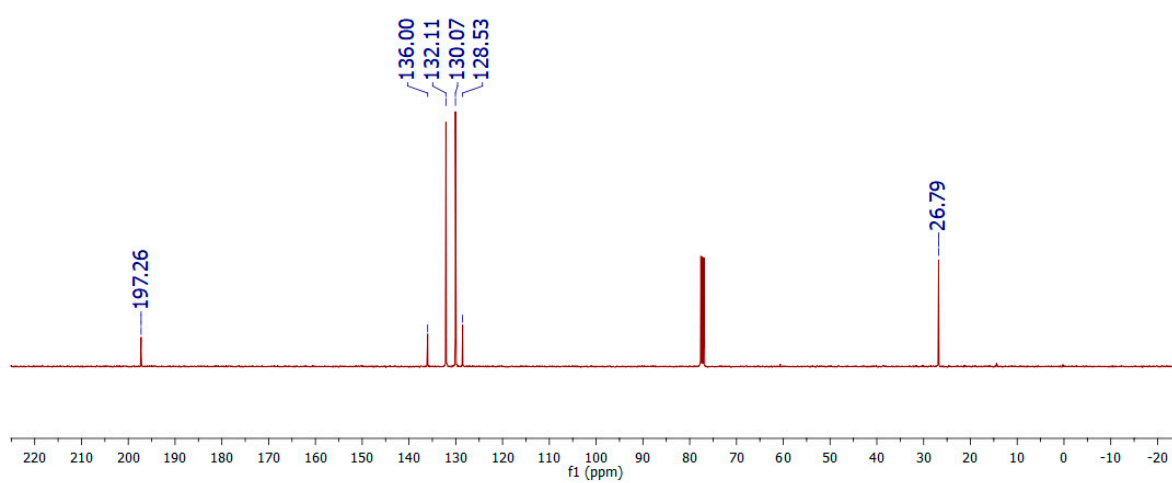



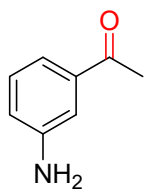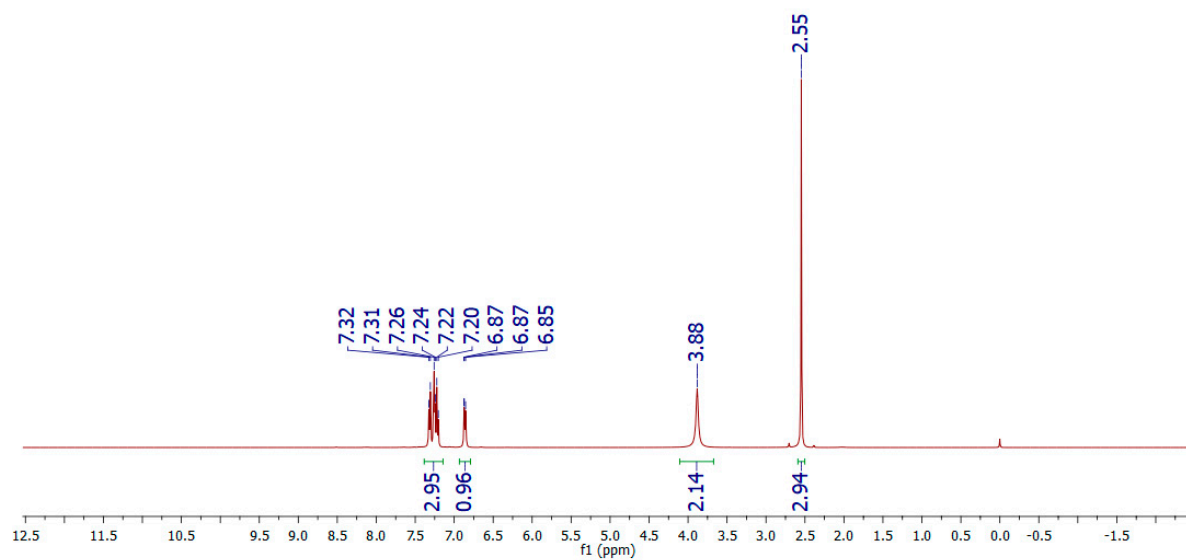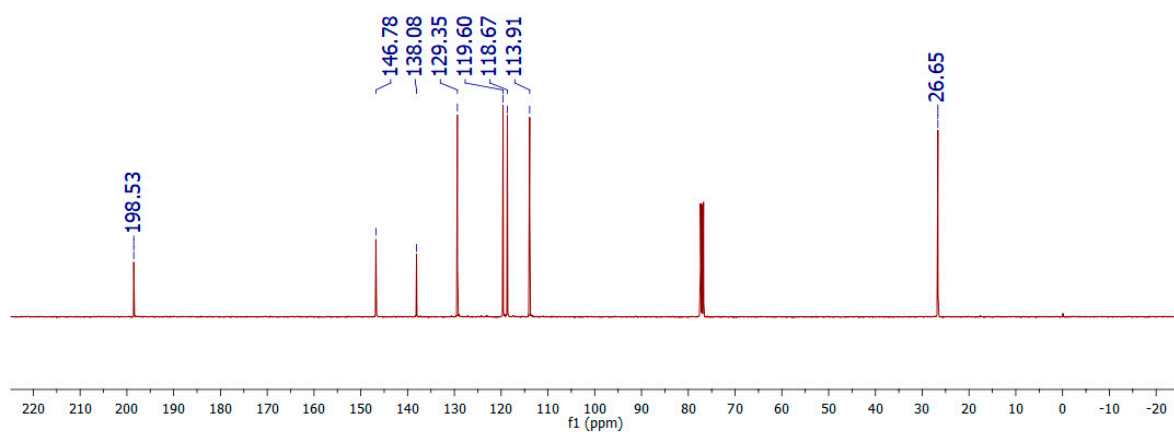

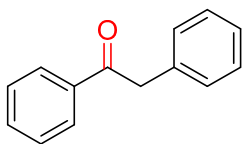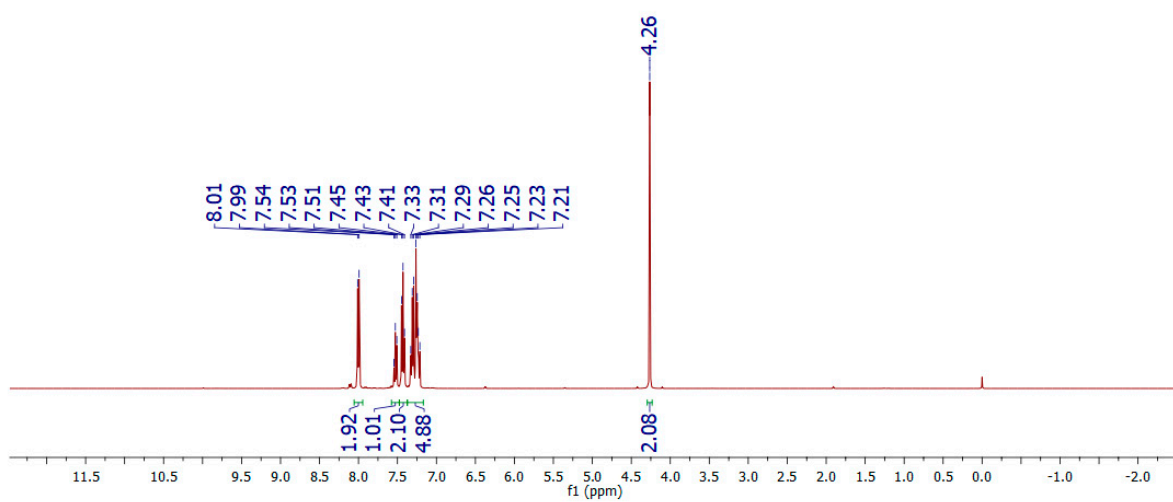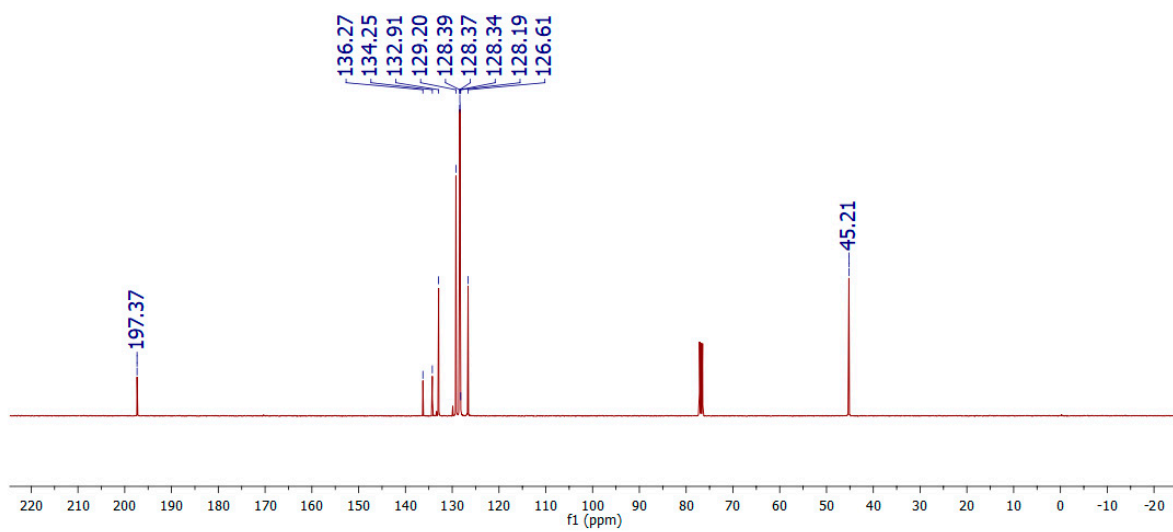

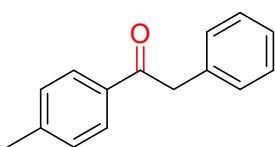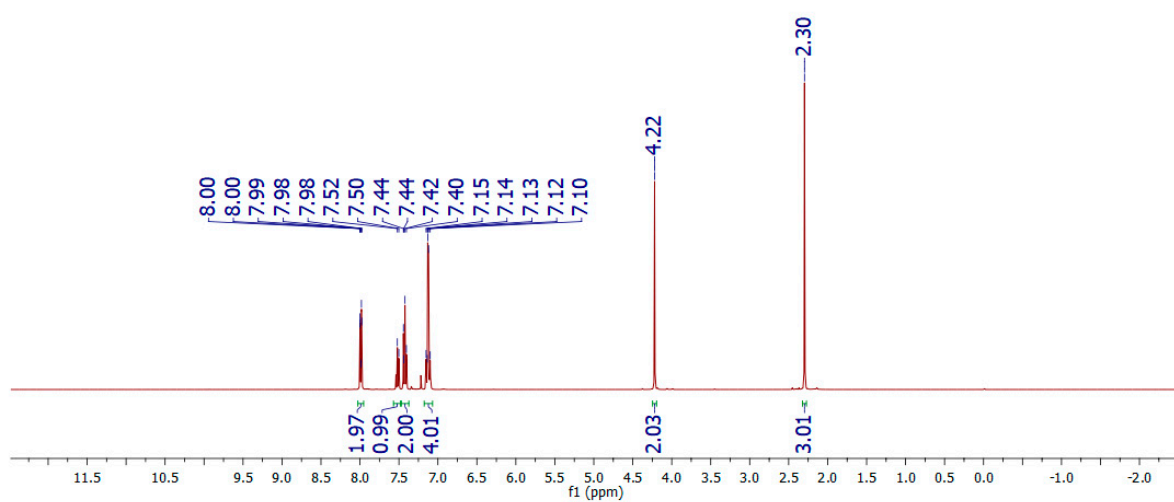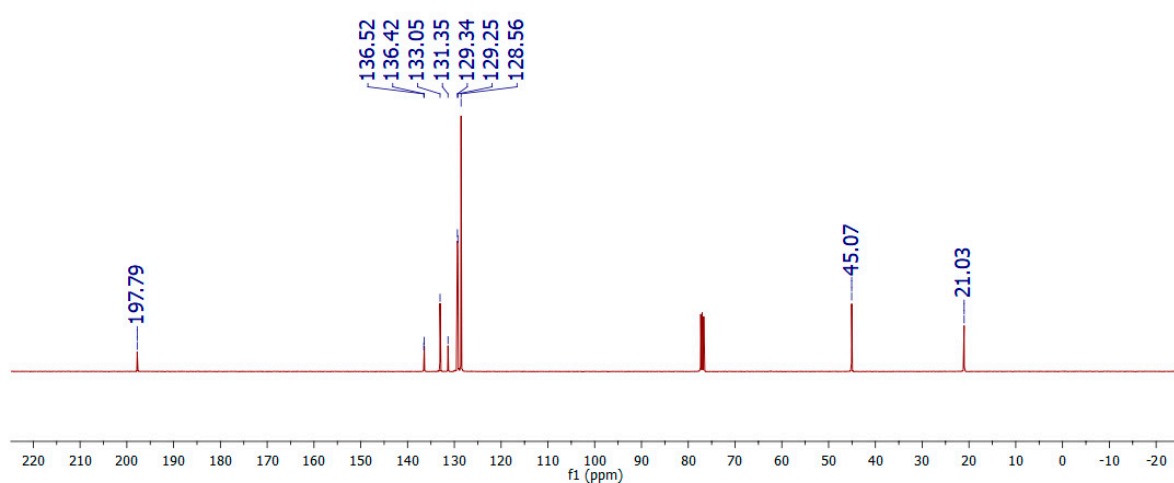

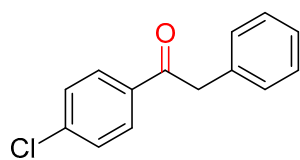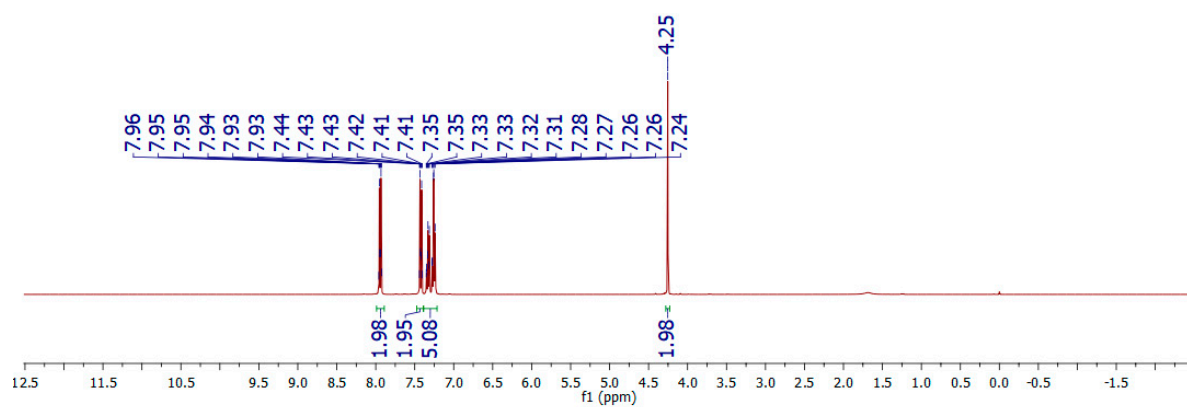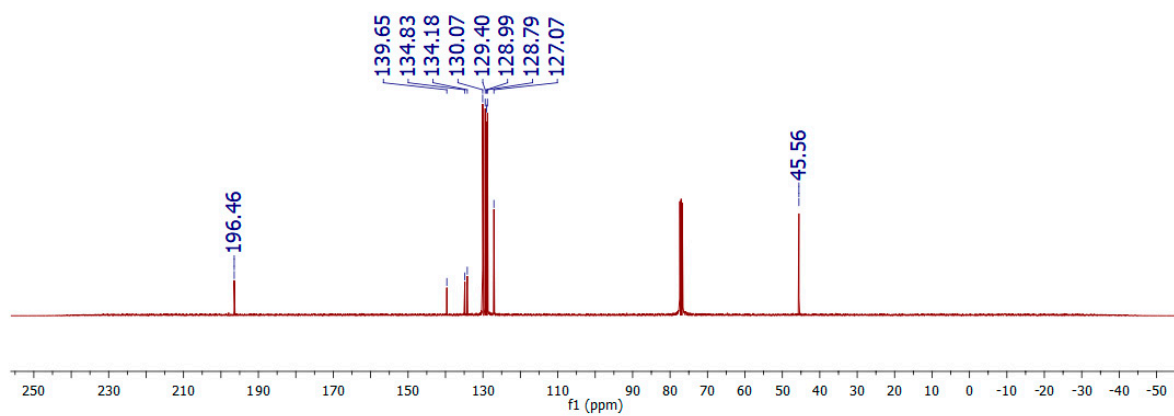

## References

1. Hieber, W.; Gruber, J. Zur Kenntnis der Eisencarbonylchalkogenide. *J. Inorganic and General Chemistry*, **1958**, 296, 91–103.
2. Wu, X.; Bezier, D.; Darcel, C. Development of the First Iron Chloride Catalyzed Hydration of Terminal Alkynes. *Adv. Synth. Catal.* **2009**, 351, 367–370.
3. Jin, X.; Oishi, T.; Yamaguchi, K.; Mizuno, N. Heterogeneously catalyzed efficient hydration of alkynes to ketones by tin–tungsten mixed oxides. *Chem. Eur. J.* **2011**, 17, 1261–1267.
4. Zheng, Q.; Cheng, X.; Li, H. Microwave Synthesis of High Activity FeSe<sub>2</sub>/C Catalyst toward Oxygen Reduction Reaction. *Catalysts* **2015**, 5, 1079–1091.
5. Polin, J.; Schottenberger, H. Conversion of methyl ketones into terminal acetylenes: ethynylferrocene. *Organic Syntheses* **1998**, 9, 411–414.
6. Li, F.; Wang, N.; Lu, L.; Zhu, G. Regioselective Hydration of Terminal Alkynes Catalyzed by a Neutral Gold(I) Complex [(IPr)AuCl] and One-Pot Synthesis of Optically Active Secondary Alcohols from Terminal Alkynes by the Combination of [(IPr)AuCl] and Cp\*RhCl[(R,R)-TsDPEN]. *J. Org. Chem.* **2015**, 80, 3538–3546.
7. Jacubert, M.; Provot, O.; Peyrat, J. F.; Hamze, A.; Brion, J. D.; Alami, M. p-Toluenesulfonic acid-promoted selective functionalization of unsymmetrical arylalkynes: a regioselective access to various arylketones and heterocycles. *Tetrahedron* **2010**, 66, 3775–3787.
8. Nishizawa, M.; Skwarczynski, M.; Imagawa, H.; Sugihara, T. Mercuric triflate-TMU catalyzed hydration of terminal alkyne to give methyl ketone under mild conditions. *Chemistry letters* **2002**, 31, 12–13.
9. Tachinami, T.; Nishimura, T.; Ushimaru, R.; Noyori, R.; Naka, H. Hydration of terminal alkynes catalyzed by water-soluble cobalt porphyrin complexes. *J. Am. Chem. Soc.* **2013**, 1, 50–53.
10. Thuong, M. B. T.; Mann, A.; Wagner, A. Mild chemo-selective hydration of terminal alkynes catalysed by AgSbF<sub>6</sub>. *Chem. Commun.* **2012**, 48, 434–436.
11. Jennings, P. W.; Hartman, J. W.; Hiscox, W. C. Alkyne hydration using Pt (II) catalysts. *Inorganica Chimica Acta* **1994**, 222, 317–322.

12. Lumbroso, A.; Vautravers, N. R.; Breit, B. Rhodium-Catalyzed Selective anti-Markovnikov Addition of Carboxylic Acids to Alkynes. *Org. Lett.* **2010**, *12*, 5498–5501.
13. Park, Y. J.; Kwon, B.; Ahn, J.; Lee, H.; Jun, C. Chelation-assisted hydrative dimerization of 1-alkyne forming  $\alpha$ ,  $\beta$ -enones by an Rh (I) catalyst. *J. Am. Chem. Soc.* **2004**, *126*, 13892–13893.
14. Liu, X.; Liu, L.; Wang, Z.; Fu, X. Visible light promoted hydration of alkynes catalyzed by rhodium (III) porphyrins. *Chem. Commun.* **2015**, *51*, 11896–11898.
15. Suzuki, T.; Tokunaga, M.; Wakatsuk, Y. Ruthenium Complex-Catalyzed anti-Markovnikov Hydration of Terminal Alkynes. *Org. Lett.* **2001**, *3*, 735–737.
16. Manikar, P. S.; Chippala, V.; Chegondi, R.; Chandrasekher, S. Ruthenium(II)-Catalyzed Hydration of Terminal Alkynes in PEG-400. *Synlett.* **2016**, *27*, 1969–1972.
17. Kusakabe, T.; Ito, Y.; Kamimura, M.; Shirai, T.; Takahashi, K.; Mochida, T.; Kato, K. Palladium(II) Bis(oxazoline) Complexes that Catalyze the Hydration of Alkynes. *Asian J. Org. Chem.* **2017**, *6*, 1086–1090.
18. Marion, N.; Ramon, R. S.; Nolan, S. P. [(NHC)AuI]-Catalyzed Acid-Free Alkyne Hydration at Part-per-Million Catalyst Loadings. *J. Am. Chem. Soc.* **2009**, *131*, 448–449.
19. Liang, S.; Jasinski, J.; Hammond, G. B.; Xu, B. Supported Gold Nanoparticle-Catalyzed Hydration of Alkynes under Basic Conditions. *Org. Lett.* **2015**, *17*, 162–165.
20. Casado, R.; Contel, M.; Laguna, M.; Romero, P.; Sanz, S. Organometallic gold (III) compounds as catalysts for the addition of water and methanol to terminal alkynes. *J. Am. Chem. Soc.* **2003**, *125*, 11925–11935.
21. Ali, M.; Srivastava, A. K.; Siangwata, S.; Smith, G. S.; Joshi, R. K. Photo induced alkyne hydration reactions mediated by a water soluble, reusable Rhodium (I) catalyst. *Catal. Commun.* **2018**, *115*, 78–81.
22. Damiano, J. P.; Pastel, M. FeCl<sub>3</sub>-H<sub>2</sub>O: a specific system for arylacetylene hydration. *J. Organomet. Chem.* **1996**, *522*, 303–305.

23. Park, J.; Yeon, J.; Lee, P. H.; Lee, K. Iron-catalyzed indirect hydration of alkynes in presence of methanesulfonic acid. *Tetrahedron Lett.* **2013**, *54*, 4414–4417.
24. Antonino, j. R. C.; Perez, A. L.; Corma, A. Regioselective hydration of alkynes by iron (III) Lewis/Brønsted catalysis. *Chem. Eur. J.* **2012**, *18*, 11107–11114.
25. Bassetti, M.; Ciceri, S.; Lancia, F.; Pasquini, C. Hydration of aromatic terminal alkynes catalyzed by iron (III) sulfate hydrate under chlorine-free conditions. *Tetrahedron Lett.* **2014**, *55*, 1608–1612.
26. Niu, T.; Jiang, D.; Li, S.; Shu, X.; Li, H.; Zhang, A.; Xu, J.; Ni, B. Visible light promoted copper-catalyzed Markovnikov hydration of alkynes at room temperature. *Tetrahedron Lett.* **2017**, *58*, 1156–1159
